## 1 Title

2 Contemporary syphilis is characterised by rapid global spread of pandemic *Treponema*  
3 *pallidum* lineages

## 4 Authors/Affiliations

5 Mathew A. Beale<sup>1,\*</sup>, Michael Marks<sup>2,3</sup>, Michelle J. Cole<sup>4</sup>, Min-Kuang Lee<sup>5</sup>, Rachel Pitt<sup>4</sup>,  
6 Christopher Ruis<sup>6,7</sup>, Eszter Balla<sup>8</sup>, Tania Crucitti<sup>9</sup>, Michael Ewens<sup>10</sup>, Candela Fernández-  
7 Naval<sup>11</sup>, Anna Grankvist<sup>12</sup>, Malcolm Guiver<sup>13</sup>, Chris R. Kenyon<sup>9</sup>, Rafil Khairulin<sup>14</sup>, Ranmini  
8 Kularatne<sup>15</sup>, Maider Arando<sup>16</sup>, Barbara J. Molini<sup>17</sup>, Andrey Obukhov<sup>18</sup>, Emma E. Page<sup>19</sup>,  
9 Fruzsina Petrovay<sup>8</sup>, Cornelis Rietmeijer<sup>20</sup>, Dominic Rowley<sup>21</sup>, Sandy Shokoples<sup>22</sup>, Erasmus  
10 Smit<sup>23,24</sup>, Emma L. Sweeney<sup>25</sup>, George Taiaroa<sup>26</sup>, Jaime H. Vera<sup>27</sup>, Christine Wennerås<sup>12,28</sup>,  
11 David M. Whiley<sup>25,29</sup>, Deborah A. Williamson<sup>26</sup>, Gwenda Hughes<sup>4</sup>, Prenilla Naidu<sup>22,30</sup>, Magnus  
12 Unemo<sup>31</sup>, Mel Krajden<sup>5,32</sup>, Sheila A. Lukehart<sup>33</sup>, Muhammad G. Morshed<sup>5,32</sup>, Helen Fifer<sup>4</sup>,  
13 Nicholas R. Thomson<sup>1,2,\*</sup>

14

15 \* Correspondence to [mathew.beale@sanger.ac.uk](mailto:mathew.beale@sanger.ac.uk) or [nrt@sanger.ac.uk](mailto:nrt@sanger.ac.uk)

16

17 <sup>1</sup>Parasites and Microbes Programme, Wellcome Sanger Institute, Hinxton, United  
18 Kingdom, <sup>2</sup>Faculty of Infectious and Tropical Diseases, London School of Hygiene & Tropical  
19 Medicine, United Kingdom, <sup>3</sup>Hospital for Tropical Diseases, University College London  
20 Hospitals NHS Foundation Trust, London, United Kingdom, <sup>4</sup>National Infection Service,  
21 Public Health England, London, United Kingdom, <sup>5</sup>British Columbia Centre for Disease  
22 Control, Public Health Laboratory, Vancouver, British Columbia, Canada, <sup>6</sup>Molecular  
23 Immunity Unit, University of Cambridge Department of Medicine, MRC-Laboratory of  
24 Molecular Biology, Cambridge, United Kingdom, <sup>7</sup>Department of Veterinary Medicine,  
25 University of Cambridge, Cambridge, United Kingdom, <sup>8</sup>Bacterial STIs Reference Laboratory,  
26 Department of Bacteriology, National Public Health Centre, Budapest,  
27 Hungary, <sup>9</sup>Department of Clinical Sciences, Institute of Tropical Medicine, Antwerpen,  
28 Belgium, <sup>10</sup>Brotherton Wing Clinic, Brotherton Wing, Leeds General Infirmary, Leeds, United  
29 Kingdom, <sup>11</sup>Microbiology Department, Vall d'Hebron Research Institute,  
30 Universitat Autònoma de Barcelona, Barcelona, Spain, <sup>12</sup>National Reference Laboratory for  
31 STIs, Department of Clinical Microbiology, Sahlgrenska University Hospital, Gothenburg,  
32 Sweden, <sup>13</sup>Public Health Laboratory, Manchester, National Infection Service, Public Health  
33 England, Manchester Royal Infirmary, Manchester, United Kingdom, <sup>14</sup>Institute of  
34 Fundamental Medicine and Biology, Kazan Federal University, Kazan, Russia, <sup>15</sup>Centre for  
35 HIV & STI, National Institute for Communicable Diseases, Johannesburg, South Africa, <sup>16</sup>STI  
36 Unit Vall d'Hebron-Drassanes, Infectious Diseases Department, Hospital Vall d'Hebron,  
37 Barcelona, Spain, <sup>17</sup>Department of Medicine, University of Washington, USA, <sup>18</sup>Tuvan  
38 Republican Skin and Venereal Diseases Dispensary, Ministry of Health of Tuva Republic,  
39 Kyzyl, Tuva Republic, Russia, <sup>19</sup>Virology Department, Old Medical School, Leeds Teaching

40 Hospitals Trust, Leeds, United Kingdom,<sup>20</sup>Colorado School of Public Health, University of  
41 Colorado, Denver, Colorado, USA,<sup>21</sup>Midlands Regional Hospital Portlaoise, Co. Laois,  
42 Ireland,<sup>22</sup>Alberta Precision Laboratories, Edmonton, Canada,<sup>23</sup>Clinical Microbiology  
43 Department, Queen Elizabeth Hospital, Birmingham, United Kingdom,<sup>24</sup>Institute of  
44 Environmental Science and Research, Wellington, New Zealand,<sup>25</sup>The University of  
45 Queensland Centre for Clinical Research, Faculty of Medicine, The University of Queensland,  
46 Brisbane, Queensland, Australia,<sup>26</sup>Department of Microbiology and Immunology at The  
47 Peter Doherty Institute for Infection and Immunity, Melbourne, Australia,<sup>27</sup>Department of  
48 Global Health and Infection, Brighton and Sussex Medical School, University of Sussex,  
49 United Kingdom,<sup>28</sup>Department of Infectious Diseases, Institute of Biomedicine, University of  
50 Gothenburg, Gothenburg, Sweden,<sup>29</sup>Pathology Queensland Central Laboratory,  
51 Queensland, Australia,<sup>30</sup>Department of Laboratory Medicine and Pathology, Faculty of  
52 Medicine, University of Alberta, Alberta, Canada,<sup>31</sup>WHO Collaborating Centre for  
53 Gonorrhoea and other Sexually Transmitted Infections, National Reference Laboratory for  
54 STIs, Faculty of Medicine and Health, Örebro University, Örebro, Sweden,<sup>32</sup>Department of  
55 Pathology and Laboratory Medicine, University of British Columbia, Vancouver, British  
56 Columbia, Canada,<sup>33</sup>Departments of Medicine/Infectious Diseases & Global Health,  
57 University of Washington, USA

58

59

## 60 Abstract

61 Syphilis is an important sexually transmitted infection caused by the bacterium *Treponema*  
62 *pallidum* subspecies *pallidum*. The last two decades have seen syphilis incidence rise in  
63 many high-income countries, yet the evolutionary and epidemiological relationships that  
64 underpin this are poorly understood, as is the global *T. pallidum* population structure. We  
65 assembled a geographically and temporally diverse collection of clinical and laboratory  
66 samples comprising 726 *T. pallidum* genomes. We used detailed phylogenetic analysis and  
67 clustering to show that syphilis globally can be described by only two deeply branching  
68 lineages, Nichols and SS14. We show that both of these lineages can be found circulating  
69 concurrently in 12 of the 23 countries sampled. To provide further phylodynamic resolution  
70 we subdivided *Treponema pallidum* subspecies *pallidum* into 17 distinct sublineages.  
71 Importantly, like SS14, we provide evidence that two Nichols sublineages have expanded  
72 clonally across 9 countries contemporaneously with SS14. Moreover, pairwise genome  
73 analysis showed that recent isolates circulating in 14 different countries were genetically  
74 identical in their core genome to those from other countries, suggesting frequent exchange  
75 through international transmission pathways. This contrasts with the majority of samples

76 collected prior to 1983, which are phylogenetically distinct from these more recently  
77 isolated sublineages. Bayesian temporal analysis provided evidence of a population  
78 bottleneck and decline occurring during the late 1990s, followed by a rapid population  
79 expansion a decade later. This was driven by the dominant *T. pallidum* sublineages  
80 circulating today, many of which are resistant to macrolides. Combined we show that the  
81 population of contemporary syphilis in high-income countries has undergone a recent and  
82 rapid global expansion.

83

## 84 Introduction

85 Syphilis, caused by the bacterium *Treponema pallidum* subspecies *pallidum* (TPA), is a  
86 prevalent sexually transmitted infection which can cause severe long-term sequelae when  
87 left untreated. Historically, syphilis is commonly believed to have caused a large epidemic  
88 across Renaissance Europe, having previously been absent or unrecognised<sup>1,2</sup>. Although  
89 accurate dating of the most recent common ancestor of TPA is still the subject of debate<sup>3-6</sup>,  
90 it is suggested that the strains of TPA that persist in the human population to this day can be  
91 traced back to that introduction into Western Europe approximately 500 years ago, and  
92 subsequently disseminated globally<sup>3,4,6</sup>.

93

94 Following the introduction of effective antibiotics after World War II, syphilis incidence  
95 fluctuated<sup>7</sup> without disappearing, until the 1980s and 1990s during the HIV/AIDS crisis when  
96 disease incidence declined markedly<sup>8</sup>, linked to community wide changes in sexual  
97 behaviour, shifting of affected populations, AIDS-related mortality and widespread  
98 antimicrobial prophylaxis of HIV infected populations. However, since the beginning of the  
99 21<sup>st</sup> century, there has been a substantial resurgence in syphilis incidence<sup>9-13</sup>. In many  
100 countries, this has been associated with populations of men who have sex with men (MSM)  
101 engaging in high risk sexual activity<sup>11,14</sup>. Transmission between MSM and heterosexuals is a  
102 particular concern due to the risk of *in utero* transmission to the foetus, leading to  
103 congenital syphilis<sup>15</sup>.

104

105 Previous genomic analyses of TPA genomes have described two deep branching  
106 phylogenetic lineages ‘SS14’ and ‘Nichols’<sup>3</sup>. SS14-lineage strains represent the vast majority  
107 of published genomes<sup>4</sup>, and phylogenetic analysis showed that the origins of the SS14-  
108 lineage can be traced back to the 1950s<sup>3</sup>, followed by subsequent expansion of sublineages  
109 occurring during the 1990s<sup>4</sup>. Our understanding of Nichols-lineage is predominantly limited  
110 to laboratory strains from the USA, with relatively few clinical strains sequenced<sup>4,16</sup>.  
111 However, most TPA genomes published to date originate from the USA<sup>4</sup>, Western  
112 Europe<sup>3,4,16,17</sup> and China<sup>18,19</sup>, and our understanding of the true breadth of diversity of TPA is  
113 incomplete<sup>20</sup>. This is partly explained, by the fact it has not been possible to culture TPA  
114 outside of a rabbit until recently<sup>21</sup>, and also explains why our view of the diversity of syphilis  
115 samples predating the 21<sup>st</sup> century is even more limited.

116

117 In this multicentre collaborative study, we used direct whole genome sequencing to  
118 generate a global view of contemporary syphilis from patients in Africa, Asia, the Caribbean,  
119 South America and Australia sampled between 1951 and 2019. Our dataset also includes a  
120 detailed analysis of the ‘within-country’ variation seen in TPA genomes in North America  
121 and Europe. We present evidence of globally spanning transmission networks with identical  
122 strains found in dispersed countries, indicating that, based on our data, TPA is essentially  
123 panmictic. Furthermore, we show that this genetic homogeneity is the result of a rapid and  
124 global expansion of TPA sublineages occurring within the last 30 years following a  
125 population bottleneck. This means the TPA population infecting patients in the 21<sup>st</sup> century  
126 is not the same as that infecting patients in the 20<sup>th</sup>.

127

## 128 Results

### 129 Describing the global population structure of *Treponema pallidum* subspecies 130 *pallidum*

131 We performed targeted sequence-capture whole genome sequencing on residual genomic  
132 DNA extracted from diagnostic swabs taken from TPA PCR positive syphilis patients, and on  
133 TPA strains previously isolated in rabbits. We combined these data with 133 previously

134 published genomes<sup>3,4,17-19,22-25</sup>. After assessment for genome coverage and quality, we had  
135 a total of 726 genomes with >25% of genome positions at >5X coverage (mean 82%, range  
136 25-97%), sufficient for primary lineage classification. This dataset included 577 new  
137 genomes sequenced directly from clinical samples, and 16 new genomes sequenced from  
138 samples passaged in rabbits.

139

140 Our dataset includes 23 countries (range 1-355 genomes per country; Figure 1A, 1C),  
141 including previously poorly or unsampled regions including Africa (South Africa (n=1) and  
142 Zimbabwe (n=18)), Scandinavia (Sweden, n=7), Central Europe (Hungary, n=20), Central Asia  
143 (Tuva Republic, Russia, n=10) and Australia (n=5), as well as substantially increasing the  
144 sampling from North America (Canada, n=157; United States, n=86) and Western Europe  
145 (Spain, n=5; Belgium, n=1; Ireland, n=4; the United Kingdom, n=355). Due to a lack of long  
146 term archived samples, 96.0% (n=697) of samples were collected from 2000 onwards  
147 (Figure 1B, 1E). Samples collected prior to 2000 (n=29) were passaged in the *in vivo* rabbit  
148 model (Supplementary Data 1), whereas most samples collected from 2000 onwards  
149 (89.8%, 626/697) were sequenced directly from clinical samples.

A

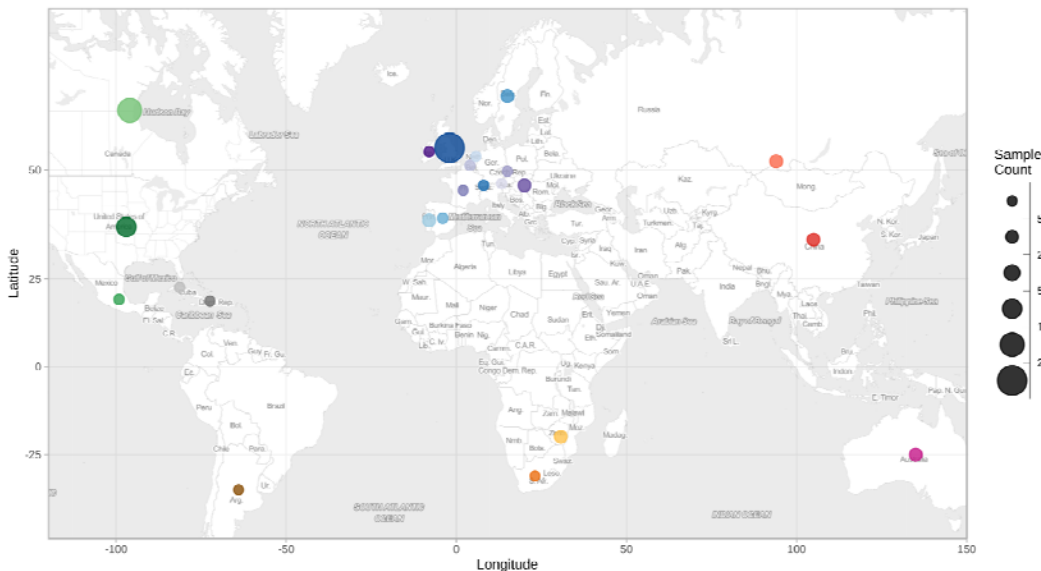

B

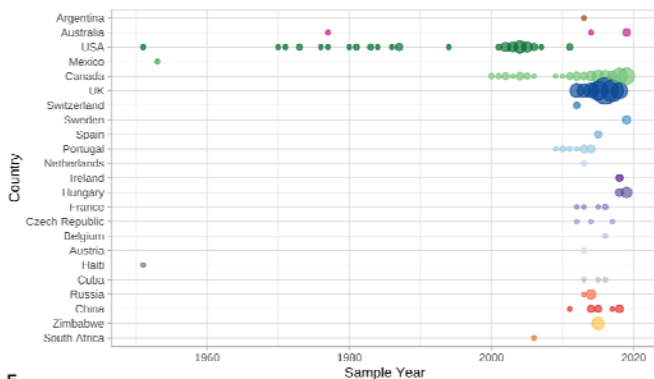

C

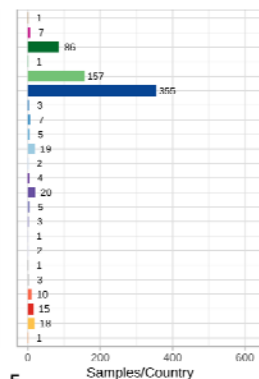

D

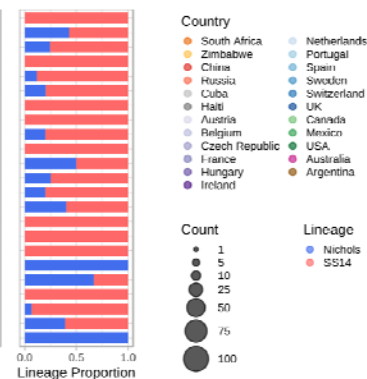

E

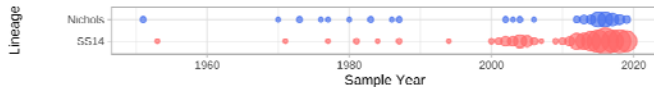

F

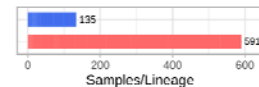

10

11 **Figure 1. Global distribution of 726 *Treponema pallidum* subspecies *pallidum* partial genomes.**

12 A- Map of sampled countries for 726 partial (>25% of genome positions) genomes. Circle size corresponds  
 13 to total number of genomes (binned into categories), and colour corresponds to country. Country  
 14 coordinates used are the country centroid position, apart from Russia (where the centroid for the Tuva  
 15 Republic is used) and Mexico (where the location of Mexico City is used). Map tiles by Stamen Design (CC-  
 16 BY 3.0), map data by OpenStreetMap (ODbl). B- Temporal distribution of samples by country. Size of circle  
 17 indicates number of samples for that year. Three samples from Baltimore (USA) had uncertain sampling  
 18 dates (1960-1980) and were set to 1970 for plotting dates (1B, 1E). Genomes derived from passaged  
 19 variants of the Nichols-1912 isolate or with uncertain collection dates are not shown in plotted timeline  
 20 (1B, 1E). C- Total count of samples by country. D- Relative proportion of country samples corresponding to  
 21 each TPA lineage (where only one sample was present per country, shows the lineage this corresponds to).  
 22 E- Temporal distribution of the samples by TPA lineage. F- Total count of samples by TPA Lineage.

33

164 Phylogenetic analysis assigned all genomes into one of two deeply branching lineages  
165 (“Nichols” or “SS14”) (Supplementary Figure 1). Looking across all well sampled countries  
166 (Figure 1C, 1D), from the first detection of the modern SS14-lineage (excluding the outlying  
167 1953 Mexico A strain) in the 1970s, we consistently see both lineages circulating broadly  
168 through until 2019 (Figure 1B, 1E). More specifically 81.3% (n=590) of genomes belonged to  
169 the SS14-lineage and 18.7% (n=136) to the Nichols-lineage, and in the 12/23 countries  
170 where both lineages were present, 80.3% (544/677, median per country 75.3%, range 33.3-  
171 93.3%) were SS14-lineage (Figure 1D, 1F). In the 11 countries showing only a single lineage,  
172 most had three or fewer samples, the notable exceptions being Portugal (n=19), Sweden  
173 (n=7) and Russia (n=10) (Figure 1C).

174

### 175 [Fine scaled analysis of SS14- and Nichols- lineage phylogenies](#)

176 To answer finer scaled evolutionary questions, we filtered our dataset to focus on the 528  
177 genomes with >75% genome sites at >5X (genome length 1,139,569 bp, mean % sites 92.9%,  
178 range 75.1–96.9%) and a mean coverage of 111X (range 11X–727X). This filtered dataset  
179 comprised 401 new and 127 published genomes (Supplementary Data 1), but excluded the  
180 only sample from Belgium, leaving 22 countries in the analysis. After excluding 19 regions of  
181 recombination and genomic uncertainty due to gene orthology or repetitive regions<sup>3,4,6</sup>, we  
182 used Gubbins<sup>26</sup> to infer a further 19 regions of putative recombination (see Methods and  
183 Supplementary Data 2 for details). We refer to the resulting masked sequence alignment as  
184 the core genome and used it to infer a whole genome maximum likelihood phylogeny using  
185 IQ-Tree<sup>27</sup> (Supplementary Figure 2). To define sublineage clusters we used 100  
186 bootstrapped trees as independent inputs to rPinecone<sup>28</sup> with a 10 SNP threshold, and  
187 evaluated their consistency using hierarchical clustering (Supplementary Figure 3). We  
188 found broad support for the Nichols sublineages across all conditions evaluated, but some  
189 parts of the SS14-lineage phylogeny were less well supported. To focus on the more stable  
190 sublineages, we required that at least 5% of the bootstrap replicates supported a cluster.  
191 Using this approach, we defined 17 sublineages and 8 singleton strains across both SS14-  
192 and Nichols-lineages (SS14: 426 genomes divided into 5 sublineages and 4 singletons;  
193 Nichols: 102 genomes divided into 12 sublineages and 4 singletons; Figure 2; Supplementary  
194 Figures 2, 4, 5).

195

196 From Figure 2 it is apparent that the phylogeny of SS14-lineage is dominated by SS14  
197 sublineage 1 (n=365), comprised of closely related genomes present in 18 countries and six  
198 continental groupings (Asia, Caribbean, Europe, North America, Oceania, and South  
199 America). The oldest example of sublineage 1 was collected in 1981 (TPA\_USL-SEA-81-3,  
200 Seattle USA), and the most recent samples were from 2019 (Figure 2C). Sublineage 2 (n=32;  
201 Figure 2E, Supplementary Figure 4) contained samples from Canada, China, the UK and the  
202 USA. In a previous analysis<sup>4</sup>, we manually divided this sublineage into two groups (one from  
203 China, one from the USA), based on temporal and geospatial divergence, and the  
204 independent evolution of different macrolide resistance alleles. However, by adding new  
205 genomes (Supplementary Figure 4), we now see that even the original cluster of samples  
206 from China is interspersed with genomes from the UK (n=1) and Canada (n=4), indicating  
207 that this is not a geographically restricted group.



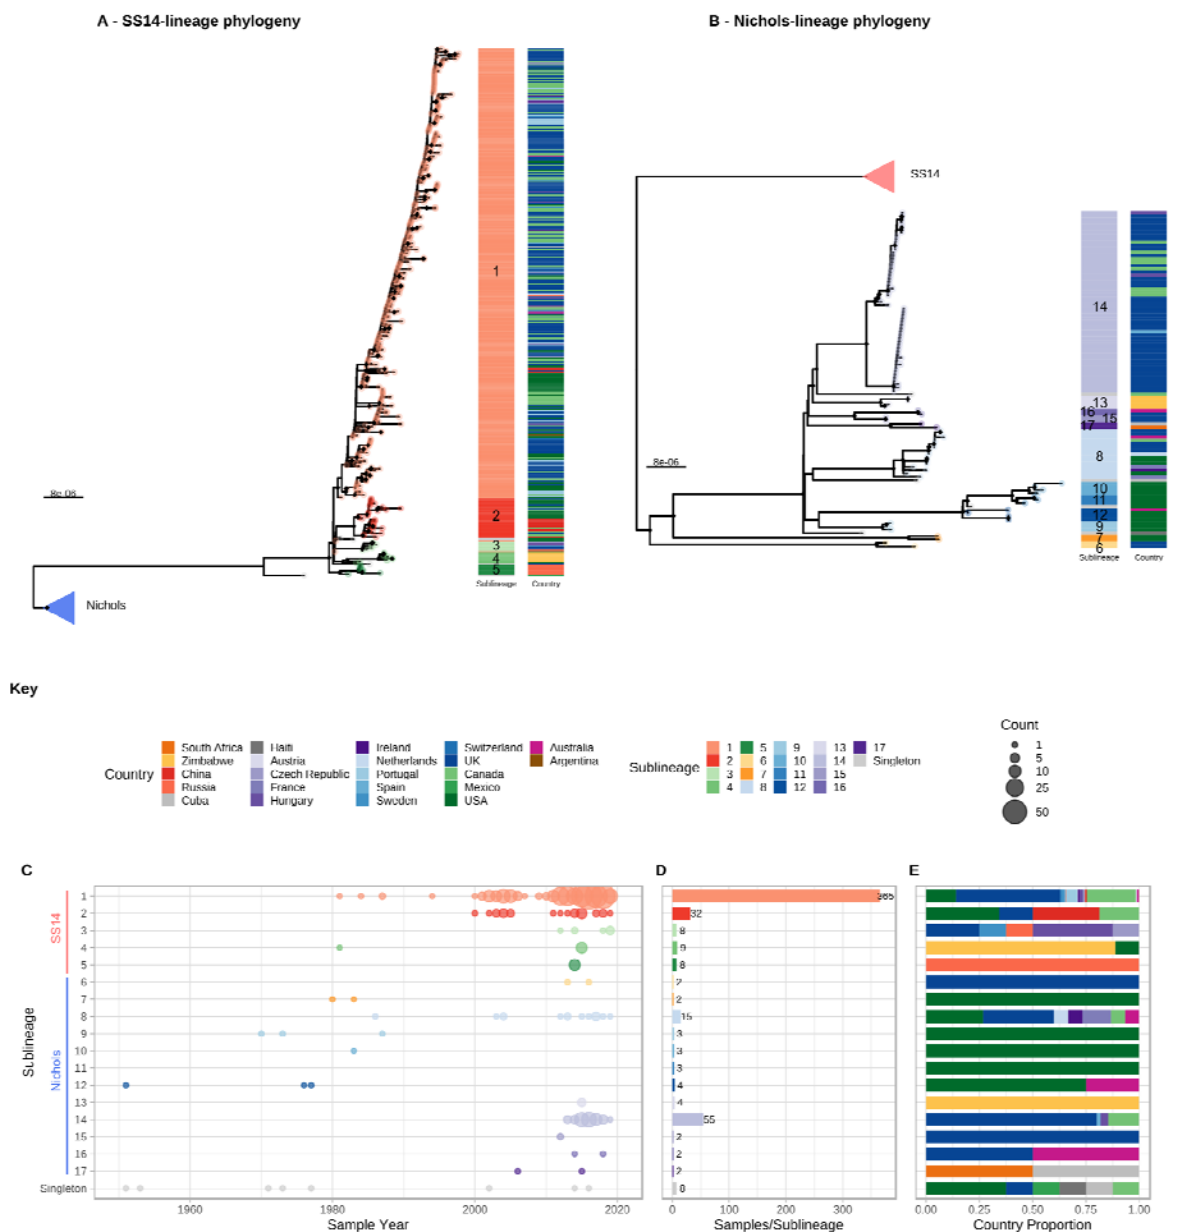

208

209 **Figure 2. Fine scaled analysis of 528 high quality (>75% reference sites) TPA genomes and**  
 210 **sublineages.** A- Recombination masked WGS phylogeny, highlighting the SS14-lineage (n=426). B-  
 211 Recombination masked WGS phylogeny, highlighting the Nichols-lineage (n=102), including four  
 212 outlying genomes (sublineages 6 & 7). For A and B, coloured strips show sublineage and country;  
 213 Tree tips show sublineage. Coloured triangle indicates node position of collapsed sister lineage. UF  
 214 Bootstraps  $\geq 95\%$  are marked with black node marks. C-Temporal distribution of samples by  
 215 sublineage (unrelated singleton genomes are grouped together). D- Total count of samples by  
 216 sublineage. E- Relative proportion of each sublineage samples corresponding to country.

217 The 12 2015 Zimbabwean genomes in our study formed two distinct clades, one nested  
218 within SS14-lineage (sublineage 4, n=8, also containing a single distantly related sample  
219 from the USA 1981, TPA\_USL-SEA-81-8), the other within Nichols-lineage (sublineage 13,  
220 n=4) and exclusively found in Zimbabwe. We also examined 10 genomes collected in the  
221 Tuva Republic, central Russia in 2013/2014, and these were distributed between three  
222 different SS14 sublineages (1, 3, 5). Sublineage 5 was found only in Tuva, whilst sublineage 3  
223 was found throughout Europe (Czech Republic, Hungary, Sweden and the UK; Figure 2E,  
224 Supplementary Figure 4), with the remaining sample from Russia belonging to the highly  
225 expanded global SS14 sublineage 1.

226

227 Consistent with previous studies<sup>3,4,16</sup> Nichols-lineage strains were genetically more diverse,  
228 with longer branch lengths and higher nucleotide diversity than SS14-lineage (Nichols  
229  $\pi=3.2 \times 10^{-5}$ , SS14  $\pi=6 \times 10^{-6}$ ), reflecting the predicted age of lineage diversification. However,  
230 our increased sampling also revealed two recent clonal expansions within the Nichols-  
231 lineage: sublineage 14 (n=55), comprising samples from Canada, Hungary, Spain and the UK  
232 (Figure 2E) and sublineage 8 (n=15) comprising samples from the Australia, Canada, France,  
233 Ireland, the Netherlands, the UK, and the USA (Supplementary Figure 5).

234

235 In addition to observing evidence of recent clonal expansions we also show greater  
236 resolution of Nichols-lineage diversity, identifying two new samples from UK patients  
237 (PHE130048A, PHE160283A, collected in 2013 and 2016 respectively) which occupy  
238 positions basal to all Nichols-lineage strains (Supplementary Figure 5). Indeed, this analysis  
239 suggested the most recent common ancestor of this sublineage was very close to the root of  
240 all TPA.

241

242 Multiple derivatives of the highly passaged prototype Nichols-lineage strain (denoted  
243 Nichols-1912) isolated in 1912 were included in our analysis (Nichols\_v2, Seattle\_Nichols,  
244 Nichols\_Houston\_E, Nichols\_Houston\_J, and Nichols\_Houston\_O). Figure 2B  
245 (Supplementary Figure 6) shows that derivatives of Nichols-1912 fall within a distinct clade  
246 which also includes independently collected contemporaneous clinical samples (some with

247 minimal passage through the rabbit model), including a sample (TPA\_AUSMELT-1) collected  
248 in Australia in 1977<sup>29</sup>. This clade could be subdivided into four sublineages (9, 10, 11, 12)  
249 and one singleton. Notably, the last sample belonging to this clade was collected in 1987  
250 (TPA\_USL-Phil-3). Hence, within our sampling framework this appears to be an example of a  
251 historic lineage becoming extinct. More broadly, we note that although this cluster of both  
252 clinical and laboratory strains were all passaged to varying degrees through the rabbit, other  
253 samples passaged in the rabbit were distributed throughout the phylogeny and were  
254 present in 9/17 sublineages (Supplementary Figure 7).

255

## 256 [Temporal analysis of population dispersal](#)

257 To infer temporal patterns within the global phylogeny, we performed Bayesian  
258 phylogenetic reconstruction using BEAST<sup>30</sup> under a Strict Clock model with a Bayesian  
259 Skyline population distribution. We excluded 8 samples from strains known to be heavily  
260 passaged or with uncertain collection dates from the previous dataset of 528, giving a  
261 dataset of 520 samples and 883 variable sites. We inferred a median molecular clock rate of  
262  $1.28 \times 10^{-7}$  substitutions/site/year (95% Highest Posterior Density (HPD)  $1.07 \times 10^{-7} - 1.48$   
263  $\times 10^{-7}$ ), equivalent to one substitution/genome every 6.9 years, consistent with recent  
264 analyses<sup>4,6</sup>.

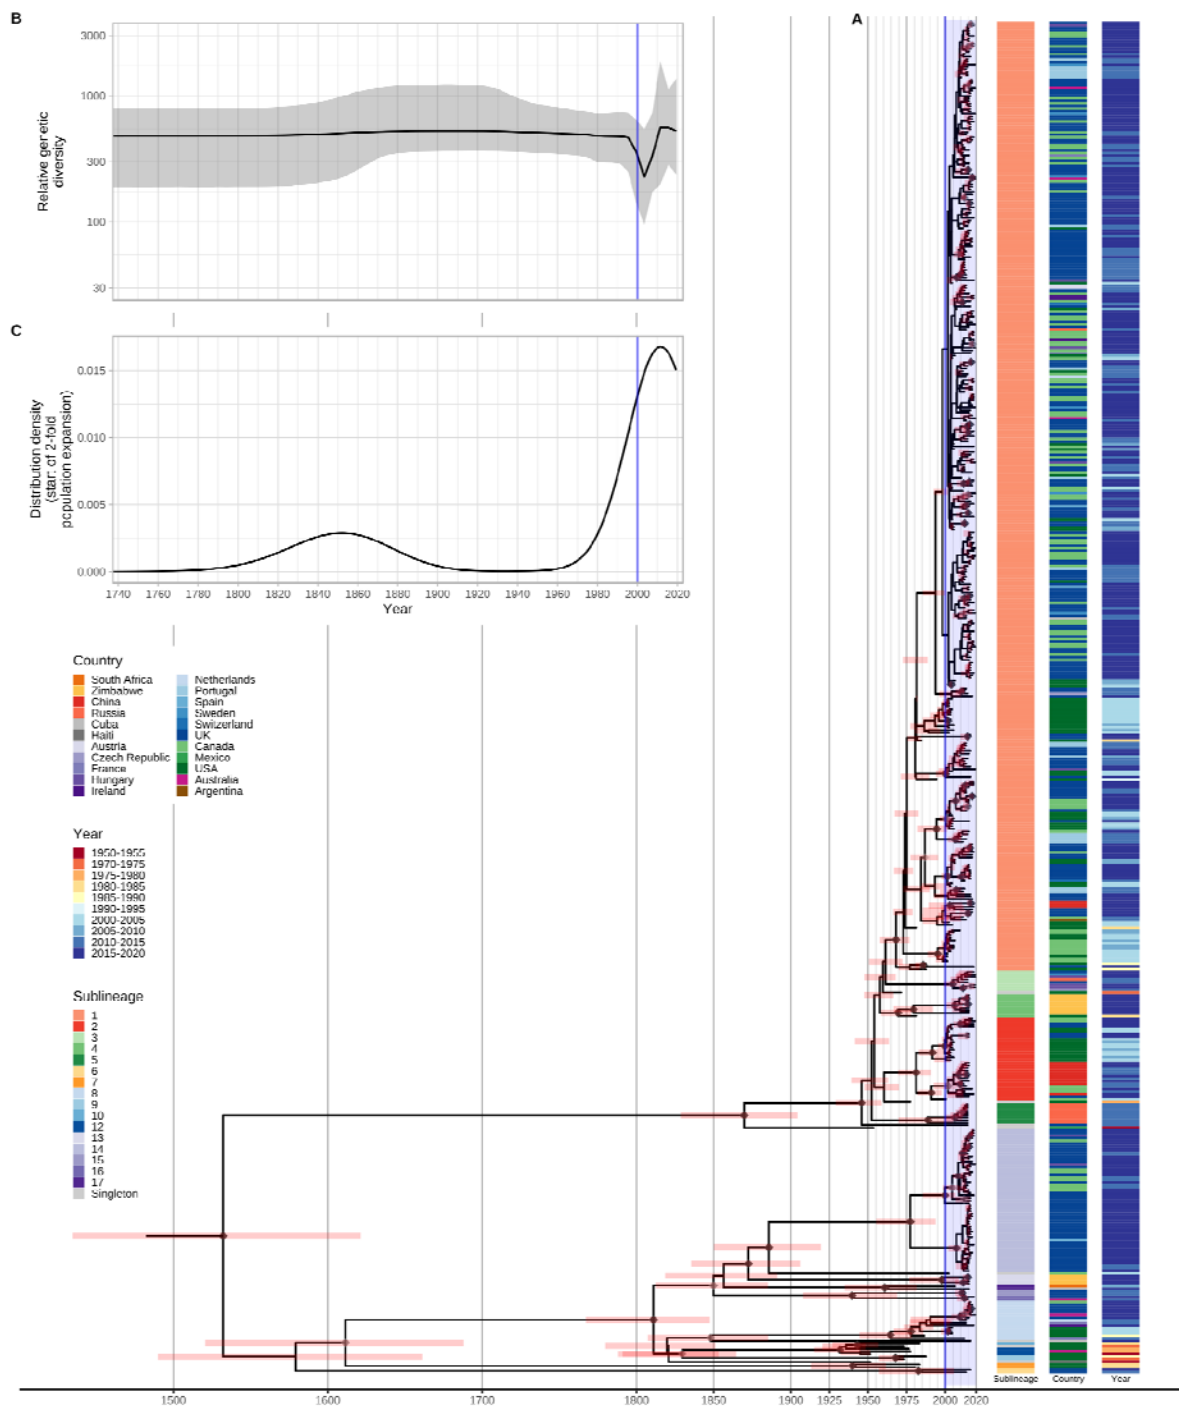

35

36 **Figure 3. Bayesian maximum credibility phylogeny of 520 TPA genomes shows population contraction**  
37 **during the 1990s, followed by rapid expansion from the early 2000s onwards.** A- Time-scaled phylogeny  
38 of 520 TPA genomes. Node points are shaded according to posterior support (black  $\geq 96\%$ , dark grey  $> 91\%$ ,  
39 light grey  $> 80\%$ ). Red bars on nodes indicate 95% Highest Posterior Density intervals. Blue line and shaded  
40 area highlight post-2000 expansion of lineages. B- Bayesian Skyline plot of genetic diversity shows small  
41 population expansion and contractions during the 19th and 20th Centuries, followed by a sharp decline  
42 and rapid re-emergence during the 1990s and 2000s. C- Posterior distribution of start dates for a 2-fold

73 expansion above skyline mean shows strong support for expansion after 1990 in 68.6% (9263/13503) of  
74 trees.

275 Within the global TPA phylogeny (Figure 3A), we observed several patterns of genomic  
276 dispersal. The first reflects the separation of the Nichols- and SS14-lineages (median date in  
277 our analysis 1534, 95% Highest Posterior Density 1430-1621), the subject of much previous  
278 analysis<sup>3,4,6</sup>. These data also showed that the common ancestor of these lineages is  
279 separated from recent samples by long phylogenetic branches and an absence of older  
280 ancestral nodes, suggesting unsampled historical diversity, and that most contemporary TPA  
281 descend from much more recent ancestral nodes. We previously dated the common  
282 ancestors for clonal expansions of 9 SS14 sublineages between the 1980s and early 2000s<sup>4</sup>.  
283 With this expanded dataset, we focussed on the ancestral nodes leading to the major  
284 clonally expanded sublineages 1, 2, 8 and 14, each having at least 15 samples.

285

286 Next, we used Bayesian Skyline analysis to determine the relative genetic diversity over  
287 different time periods in the phylogeny (Figure 3B), showing a very sharp decline during the  
288 1990s and 2000s, followed by an equally sharp rise that continued until present day. To test  
289 the statistical support for this expansion, we extracted the proportion of trees in the  
290 posterior distribution supporting a >2-fold population expansion above the population  
291 mean (68.6%, 9263/13503 trees), and plotted the distribution of expansion start dates  
292 (Figure 3C) (median date 2011). We further tested the proportion of trees supporting a 2-  
293 fold population decline between 1990-2015 (90.7%, 12248/13503 trees, median date 2000)  
294 and a 2-fold population expansion between 1990-2015 (59.0%, 7966/13503 trees, median  
295 date 2012) (Supplementary Figure 8). These findings were also apparent in SS14 sublineages  
296 1 and 2 (Supplementary 9) but not for Nichols sublineage 8. We had insufficient temporal  
297 signal to repeat this analysis on multi-country expanded Nichols sublineage 14  
298 (Supplementary Figure 10).

299

### 300 **Global sharing of sublineages and identical strains**

301 To further understand the patterns of recent population expansion we sought evidence of  
302 sharing of sublineages among countries, classifying sublineages as singletons (n=8), private  
303 to a country (n=8), or multi-country (n=9), and found that 20/22 countries contained at least  
304 one multi-country sublineage (Figure 4A, Supplementary Figure 11). We inferred pairwise

305 SNP distances for genomes within and between each country (Figure 4C, 4D), and where  
306 there was more than one sample (n=18), we found fewer than 26 (SS14-lineage) and 80  
307 (Nichols-lineage) pairwise SNPs separating genomes within any one country (Figure 4C),  
308 illustrating the close genetic relationships between samples (particularly SS14-lineage). We  
309 also found very low genetic distance between paired samples from different countries, with  
310 27 country pairings (14 countries) showing zero core genome pairwise SNPs (Figure 4D). In  
311 particular Canada, UK and USA, with the highest sampling (Figure 4B), showed the most zero  
312 pairwise interactions with other countries (Figure 4D). Therefore, we cannot rule out similar  
313 transmission events occurring between other countries. We compared pairwise SNP  
314 distances with geographical distance between country centroids. Although we found a  
315 moderate correlation for Nichols-lineage (Pearson's correlation 0.49,  $p < 0.001$ ), this was  
316 lower for SS14-lineage (0.31,  $p < 0.001$ ) and for the four largest multi-country sublineages  
317 (sublineage 1, 0.09,  $p < 0.001$ ; sublineage 2, 0.43,  $p < 0.001$ ; sublineage 8, 0.27,  $p < 0.001$ ;  
318 sublineage 14, 0.08,  $p < 0.001$ ) (Supplementary Figure 12). Hence, overall this indicates weak  
319 geographical structure for TPA.

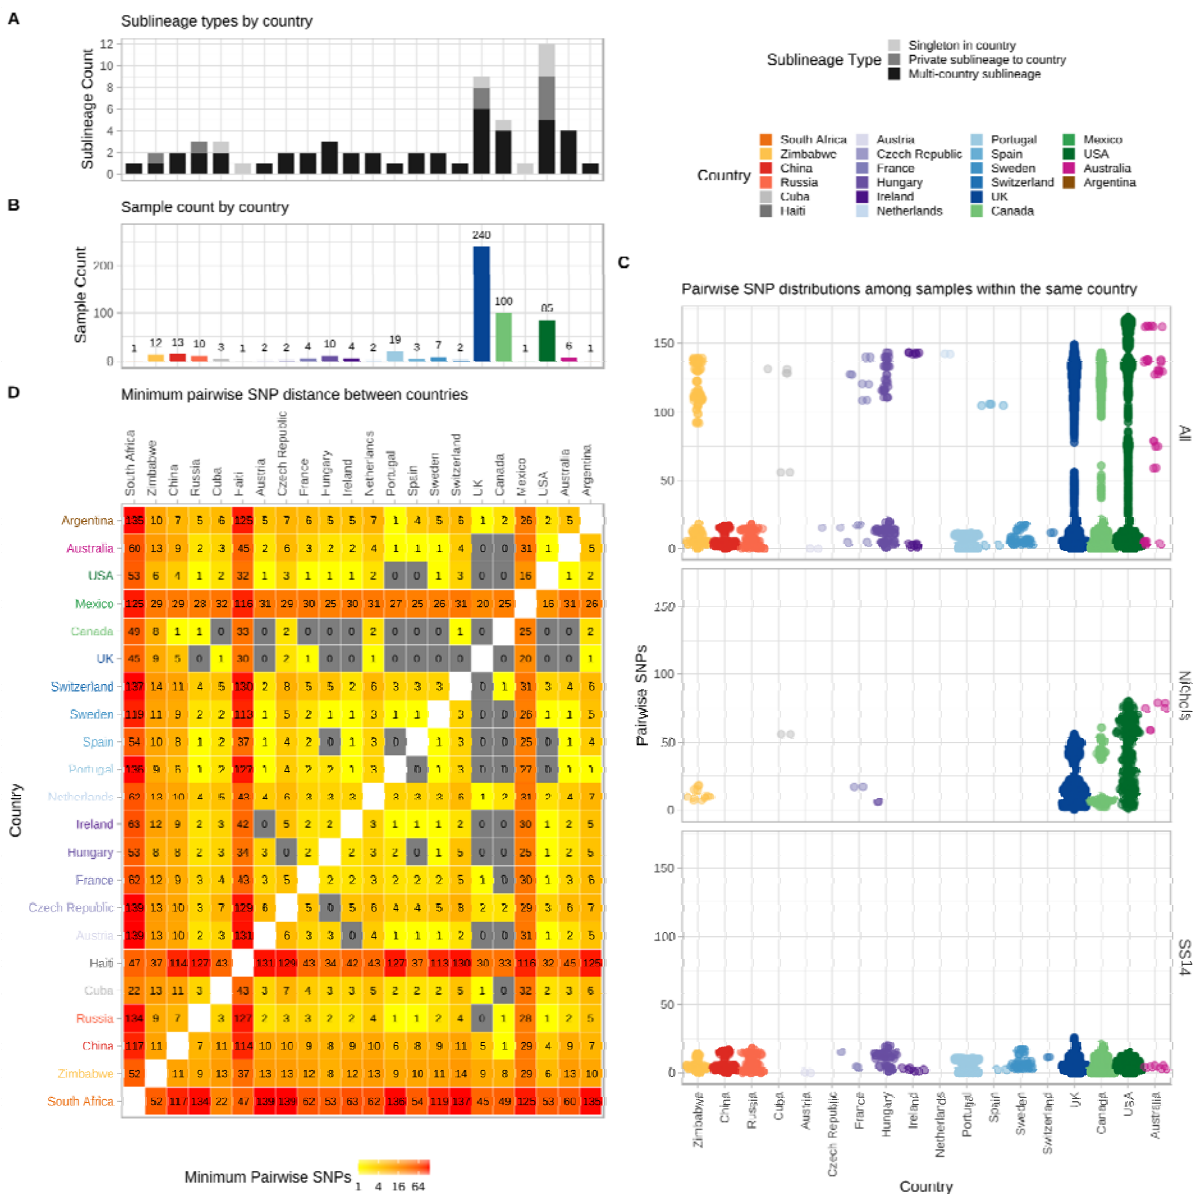

320

321 **Figure 4. Substantial sharing of closely related strains within and between countries.** A- Number  
 322 of sublineages found per country, classified by sublineage distribution (multi-country=black, private  
 323 to one country=medium grey, singleton=light grey). B- Total high-quality genomes per country. C-  
 324 Pairwise comparison of SNP distance distributions from samples in each country (where >1 sample),  
 325 across all samples and within lineages. D- Minimum pairwise SNPs between samples from different  
 326 countries. All pairwise SNP comparisons exclude comparisons with same samples. Haiti, South  
 327 Africa and Mexico appear striking outliers in terms of genetic relatedness (D), but this reflects that  
 328 the Haiti and Mexico samples were collected in the 1950s, and we had only a single genome from  
 329 these countries.



330 To understand these observations more fully, we focussed on British Columbia (Canada; BC)  
331 and England, both of which have experienced a recent rise in syphilis incidence  
332 (Supplementary Figure 13A), and for which we had a large number of samples. Included  
333 were 84 high quality BC genomes collected by the BC Centre for Disease Control between  
334 2000 and 2018. From England, we had 240 high quality genomes from samples taken by the  
335 National Reference Laboratory at Public Health England (n=198) and non-referring  
336 laboratories in London (n=26), Brighton (n=9), Leeds (n=2) and Manchester (n=5) collected  
337 between 2012 and 2018. In BC, SS14 sublineage 1 dominated throughout the 18-year survey  
338 period, representing 82% of all BC genomes (Supplementary Figure 13B). In addition,  
339 isolated cases of SS14 sublineage 2 were seen in 2000 and 2012 as well as a single Nichols-  
340 lineage sample (singleton) in 2002 (Supplementary Figure 13B). Then from 2013 onwards,  
341 we detected two new Nichols sublineages: Nichols sublineage 8 and sublineage 14. The  
342 latter two lineages were also found across USA and Europe (Figure 2E).

343

344 Both Nichols- and SS14-lineages were consistently present in the English samples between  
345 2012 and 2018. All of the common sublineages (4/4) found in BC were also present in  
346 England, as well as 4 additional sublineages (Nichols sublineages 6, 15, 16; SS14 sublineage  
347 3) and one SS14 singleton strain not detected in BC (Supplementary Figure 13B). Sublineage  
348 14, first detected in BC in 2013, was also the most numerous Nichols sublineage in England,  
349 but notably was not detected here until 2014.

350

351 Pairwise SNP distances between orthogonal genomes from the same sublineages showed  
352 2622 pairwise combinations of BC (n=56) and English samples (n=78) sharing zero pairwise  
353 SNPs over the core genome alignment for isolates collected between 2004 and 2019. To  
354 understand the effect of temporal distance we compared both the pairwise SNP distance  
355 and the pairwise time distance (in years) between genomes from the same sublineage  
356 (Supplementary Figure 13D). These data showed that the mean number of years separating  
357 identical core genomes was 2.5 years (range 0-15), and the mean temporal distances of  
358 identical genomes were similar within BC (2.9 years) and England (1.9 years) and between  
359 the two (2.7 years). The number of pairwise SNPs increased with temporal separation across  
360 all BC and English genomes from the same sublineage (Pearson's Correlation 0.126,

361  $p < 0.001$ ), with a mean of 4.9 SNPs (range 0–23) separating genomes from the same year  
362 and sublineage, compared to 7.8 SNPs (range 6–11) after 19 years (Supplementary Figure  
363 13D). This means that inference of direct patient-to-patient TPA transmission using the core  
364 genome will be challenging at the population level, and limit opportunities for real time  
365 genomic epidemiology because identical genomes can be separated by many years, and  
366 confidence intervals around temporal reconstructions will be broad. In the case of  
367 sublineage 14, we first detected this in BC, then the following year in England. Since we had  
368 a deeply sampled survey of populations over time for both countries, it seems likely that  
369 this represents a novel introduction into BC and England. However, low temporal rates and  
370 incomplete sampling, mean this must be interpreted with caution.

371

372 We also found some rarer sublineages – either as singleton strains, or those private to a  
373 single country. Whilst this might be expected in poorly sampled and geographically distant  
374 locations, such as Cuba, Haiti, Mexico and Zimbabwe, we found that the majority of private  
375 (6/8) and singleton (5/8) sublineages were actually from Canada, the UK or USA (Figure 4A),  
376 suggesting deeper sampling elsewhere will also find novel diversity.

377

378 Given our observations of individual sublineage expansion, we investigated whether the  
379 expansion could be related to antimicrobial resistance. Overlaying inferred macrolide  
380 resistance causing SNPs (A2058G, A2059G) in the ribosomal 23S rRNA gene on these  
381 population expansions showed evidence of macrolide resistance in 6/9 multi-country  
382 sublineages (Supplementary Figure 14), with the majority of samples being resistant in the  
383 largest sublineages 1, 2, 8 and 14. In contrast, only one private sublineage (sublineage 6,  
384  $n=2$ ) contained a macrolide resistant sample, suggesting that macrolide resistance is  
385 potentially linked to expansion in multicountry sublineages.

386

387

## 388 Discussion

389 Previous attempts to understand the origins of the original syphilis pandemic<sup>3,6,20</sup>, as well as  
390 the dynamics of the current one<sup>3,4</sup>, have been constrained by the technical difficulty of  
391 sequencing TPA genomes, as well as relatively small datasets, with limited geographical  
392 diversity and sampling biases. In our study, we assembled the most comprehensive and  
393 broad ranging collection of syphilis samples from around the world to date, including  
394 samples from both the 20<sup>th</sup> and 21<sup>st</sup> century. Despite this, we still find that the TPA  
395 population consists of just two deep branching lineages, SS14-lineage and Nichols-lineage,  
396 with no outlying lineages. We were able to show that these lineages are both globally  
397 distributed and, where we have densely sampled, we find the relative proportions of each  
398 to be consistent. Although the overall diversity detected within the Nichols-lineage is far  
399 greater than that of SS14-lineage, suggesting earlier dissemination, we also found that these  
400 two major lineages exhibit similar phylodynamics, with recent sublineage expansions  
401 apparent in both lineages. This suggests that both Nichols- and SS14-lineages are capable of  
402 exploiting the transmission pathways driving the current syphilis epidemic.

403

404 Amongst our data, we sequenced the first genomes from syphilis patients in Africa, and our  
405 analysis shows that these genomes represented novel private sublineages, but their  
406 genomic diversity is nested entirely within the existing phylogenetic framework – these TPA  
407 genomes are not unusual. Indeed, we even observed the same pattern of Nichols- and SS14-  
408 lineages both being present in Zimbabwe, suggesting multiple introduction events into  
409 Zimbabwe. The same was true for genomes sequenced from Central Russia (Tuva Republic),  
410 where the private sublineage 5 represented novel, but entirely unremarkable genomic  
411 diversity.

412

413 In our study, we found that sublineages and closely related samples were more likely to be  
414 shared among deeply sampled countries. This suggests that sublineage sharing between  
415 countries is high, and deeper sampling of other countries will likely reveal similar patterns of  
416 sharing. As sampling depth increased we also found more rare sublineages, notably  
417 sublineage 6, representing novel outlying genetic diversity basal to all contemporary

418 Nichols-lineage examples, in 2/240 contemporary UK patients. This suggests that some  
419 sublineages may truly be rare, whilst the high frequency of other sublineages could reflect  
420 either fitness advantages or epidemiological factors such as infecting patients within  
421 particularly high-risk sexual networks, allowing these sublineages to expand more  
422 successfully. Singleton or private sublineages could reflect insufficient sampling of a country  
423 or region, or sampling biases within a country (e.g. published genomes from Portugal<sup>17</sup>  
424 came from a single clinic in Lisbon). These sublineages may therefore reflect transmission  
425 networks that are either contained within a less internationally mobile demographic, or may  
426 reflect transmission networks common in a region that is otherwise poorly sampled (e.g.  
427 Africa).

428

429 Our observation that the well-studied Nichols reference genomes (largely derived from or  
430 related to the original Nichols-1912 isolate) form an isolated clade, not represented in  
431 contemporary TPA, is important. One possible explanation is that these samples form a  
432 distinct clade due to convergent evolution in the rabbit model. However, this clade contains  
433 samples both extensively and minimally passaged, whilst other samples passaged in rabbits  
434 are distributed throughout the broader phylogeny, included in three SS14 sublineages (1, 2,  
435 4) and two additional Nichols sublineages (7, 8). This indicates that passage in the rabbit  
436 model has not overly affected other parts of the phylogeny. The majority of Nichols-lineage  
437 strains collected prior to 1988 belong to this clade, and these samples mostly come from a  
438 small group of laboratories in the USA. Therefore, it is also tempting to suggest that this  
439 reflects a sampling bias for that time period. However, the phylogenetic placement of  
440 TPA\_AUSMELT-1 within the same clade, isolated in 1977 in Australia<sup>29</sup>, and independently  
441 cultured and sequenced, contradicts this hypothesis, and may suggest that this clade  
442 represents the dominant TPA of the period. The complete absence of related genomes in  
443 contemporary sampling could represent a decline to becoming a rare or even extinct lineage  
444 and therefore implies that the Nichols reference strain is not representative of  
445 contemporary syphilis, or even contemporary Nichols-lineage strains.

446

447 Our data show that for some sublineages, modern syphilis is a truly global disease, with  
448 shared lineages, sublineages and indeed nearly identical strains all over the world. The large

449 expansions of highly related genomes, in particular sublineage 1, represent the bulk of  
450 sequenced genomes in our dataset, and the widespread sharing of major lineages suggests  
451 we have sampled from a series of globally contiguous sexual networks, making  
452 contemporary syphilis effectively panmictic.

453

454 Furthermore, we find evidence of a striking change in the genetic diversity and effective  
455 population size of TPA genomes, suggestive of a possible population bottleneck occurring  
456 between the late 1990s and early 2000s. This was followed by a rapid expansion of certain  
457 sublineages, leading to the contemporary TPA population structure. This bottleneck,  
458 potentially a consequence of post-HIV safe sex messaging, persistent antimicrobial  
459 prophylaxis in at risk HIV positive populations, and possibly HIV-associated mortality,  
460 appears to have led to a striking duality in the TPA dominating populations before and after.  
461 The rapid expansion may be attributed to a relaxation of sexual behaviour following the  
462 widespread introduction of highly active antiretroviral therapy. Notably, although macrolide  
463 resistance was not universally distributed throughout the phylogeny or present in all  
464 sublineages, most of the multi-country sublineages were largely macrolide resistant, and  
465 this could also have played a role through off-target effects, e.g. during treatment of other  
466 (particularly sexually transmitted) infections<sup>31</sup>. Azithromycin and other macrolides are no  
467 longer recommended treatments at any stage of syphilis in the European syphilis  
468 management guidelines<sup>32</sup>.

469

470 There have been some documented reports of clinically diagnosed syphilis caused by  
471 *Treponema pallidum* subspecies *endemicum* (TEN)<sup>33,34</sup>. In our study, most novel genomes  
472 were clinically diagnosed and confirmed by diagnostic PCRs that do not discriminate  
473 between subspecies, yet we found only TPA. Therefore, although we cannot rule out that  
474 TEN causes syphilis due to the limits of our sampling framework, our data suggest TEN is not  
475 a major contributor to the burden of syphilis in any of our well sampled countries.

476

477 Our study has a number of limitations. Our samples were collected in an opportunistic  
478 manner, using residual samples available in regional or national archives. Since our sampling

479 coverage is uneven, with some countries either missing or under-sampled, it was not  
480 possible to infer the direction of transmission between countries. Nevertheless, we provide  
481 a snapshot of strains from Africa, Asia and South America, all of which overlap with the  
482 genetic diversity of our more deeply sampled regions (North America and Europe),  
483 suggesting we have captured key global lineages. We also show that even deeply sampled  
484 countries can harbour rare sublineages, and it is therefore likely that future studies will  
485 reveal further novel diversity. We were constrained in our ability to obtain and sequence  
486 older samples from prior to the widespread adoption of molecular diagnostics in the early  
487 2000s, and this is largely influenced by the difficulty in isolating new strains prior to the  
488 recent development of *in vitro* culture<sup>21</sup>, and the lack of, and long-term storage of clinical  
489 swabs. Most (but not all) older strains come from the USA, and this could mean that we do  
490 not accurately reflect the global population structure prior to 2000.

491

492 Despite this our data show the *T. pallidum* infecting patients today is not the same *T.*  
493 *pallidum* infecting patients even 30 years ago – ancestral sublineages appear to have  
494 become extinct, being replaced by new sublineages that have swept to dominance across  
495 the globe with the dramatic upswing in syphilis cases in the US, UK, and other Western  
496 European countries, which were heavily sampled in our study. That such a bottleneck is  
497 linked to HIV-related behavioural change during the 1990s, rather than the introduction of  
498 antibiotics after the Second World War, further supports the importance of sexual  
499 behaviour in transmission dynamics. In future work, it would be interesting to integrate  
500 epidemiological evidence of sexual networks in purpose designed cohort studies to explore  
501 this further.

502

## 503 **Methods**

### 504 Samples

505 Ethical approval for all clinical samples was granted by the London School of Hygiene and  
506 Tropical Medicine Observational Research Ethics Committee (REF#16014) and the National

507 Health Service (UK) Health Research Authority and Health and Care Research Wales (UK;  
508 19/HRA/0112).

509

510 Novel samples from Australia (Brisbane, Melbourne), Belgium (Antwerp), Canada (Alberta,  
511 British Columbia), Hungary (National collection), Ireland (Dublin), Russia (Tuva Republic),  
512 South Africa (Johannesburg), Spain (Barcelona), Sweden (National collection), the UK  
513 (National collection), Zimbabwe (3 regions), were sequenced directly from genomic DNA  
514 extracted from clinical patient swabs or biopsies, typically utilising de-identified residual  
515 diagnostic samples which were further pseudonymised before analysis. Additional novel  
516 samples from Australia (Melbourne), Haiti and the USA (6 cities) were sequenced from  
517 historic freezer archives after prior passage in the rabbit model<sup>4</sup>.

518

519 DNA extracts were quantified by qPCR (TPANIC\_0574) as previously<sup>4</sup>, and grouped into  
520 pools of either 32 or 48 with similar (within 2 C<sub>T</sub>) treponemal load with high concentration  
521 outlier samples diluted as necessary. We added 4µl pooled commercial human gDNA  
522 (Promega) to all samples to ensure total gDNA > 1µg/35µl, sufficient for library prep.

523

#### 524 Sequencing

525 Extracted genomic DNA was sheared to 100-400 bp (mean distribution 150 bp) using an  
526 LE220 ultrasonicator (Covaris Inc). Libraries were prepared (NEBNext Ultra II DNA Library  
527 prep Kit, New England Biolabs, Massachusetts, USA) using initial adaptor ligation and  
528 barcoding with unique dual indexed barcodes (Integrated DNA Technologies, Iowa, USA).  
529 Dual indexed samples were amplified (6 cycles of PCR, KAPA HiFi kit, Roche, Basel,  
530 Switzerland), quantified (Accuclear dsDNA Quantitation Solution, Biotium, California, USA),  
531 then pooled in preassigned groups of 48 or 32 to generate equimolar pools based on Total  
532 DNA concentration. 500 ng pooled DNA was hybridised using 120-mer RNA baits (SureSelect  
533 Target enrichment system, Agilent technologies; Bait design ELID ID 0616571)<sup>4,35</sup>. Enriched  
534 libraries were sequenced on Illumina HiSeq 4000 to generate 150 bp paired end reads at the  
535 Wellcome Sanger Institute (Cambridgeshire, UK) as previously described<sup>36</sup>. For one rabbit  
536 passaged sample from Melbourne, Australia (TPA\_AUSMELT-1)<sup>29</sup>, genomic DNA extracted

537 from historically archived tissue lysate was sequenced on Illumina NextSeq 500 (150 bp  
538 paired end reads, Nextera DNA Flex libraries) without any prior enrichment to an estimated  
539 1Gb/sample at the Doherty Institute (Melbourne, Australia).

540

#### 541 Sequence analysis and Phylogenetics

542 We filtered *Treponema* genus-specific sequencing reads using the full bacterial and human  
543 Kraken 2<sup>37</sup> v2.0.8 database (March 2019), followed by trimming with Trimmomatic<sup>38</sup> v0.39  
544 and downsampling to a maximum of 2,500,000 using seqtk v1.0 (available at  
545 <https://github.com/lh3/seqtk>) as previously described<sup>4</sup>. For publicly available genomes, raw  
546 sequencing reads were downloaded from the European Nucleotide Archive (ENA) and  
547 subjected to the same binning and downsampling procedure. For five public genomes (see  
548 Supplementary Data 1), raw sequencing reads were not available; for these we simulated  
549 150 bp PE perfect reads from the RefSeq closed genomes using Fastq (available at  
550 <https://github.com/sanger-pathogens/Fastq>).

551

552 For phylogenomic analysis, we mapped *Treponema*-specific reads to a custom version of the  
553 SS14\_v2 reference genome (NC\_021508.1), after first masking 12 repetitive Tpr genes (Tpr  
554 A-L), two highly repetitive genes (arp, TPANIC\_0470), and five FadL homologs  
555 (TPANIC\_0548, TPANIC\_0856, TPANIC\_0858, TPANIC\_0859, TPANIC\_0865) using bedtools<sup>39</sup>  
556 v2.29 maskfasta (positions listed in Supplementary Data 2). We mapped prefiltered  
557 sequencing reads to the reference using BWA mem<sup>40</sup> v0.7.17 (MapQ  $\geq$  20, excluding reads  
558 with secondary mappings) followed by indel realignment using GATK v3.7 IndelRealigner,  
559 deduplication with Picard MarkDuplicates v1.126 (available at  
560 <http://broadinstitute.github.io/picard/>), and variant calling and consensus pseudosequence  
561 generation using samtools<sup>41</sup> v1.6 and bcftools v1.6, requiring a minimum of two supporting  
562 reads per strand and five in total to call a variant, and a variant frequency/mapping quality  
563 cut-off of 0.8. Sites not meeting our filtering criteria were masked to 'N' in the final  
564 pseudosequence. After mapping and pseudosequence generation, we repeated the masking  
565 of the 19 genes on the final multiple sequence alignment using remove\_block\_from\_aln.py  
566 available at [https://github.com/sanger-pathogens/remove\\_blocks\\_from\\_aln/](https://github.com/sanger-pathogens/remove_blocks_from_aln/) to ensure



567 sites originally masked in the reference were not inadvertently called with SNPs due to  
568 mapped reads overlapping the masked region. These 19 regions of recombination and  
569 genomic uncertainty due to gene orthology or repetitive regions<sup>3,4,6</sup> accounted for 30,071  
570 genomic sites (Supplementary Data 2).

571

572 For basic lineage assignment of genomes, we excluded sequences with >75% genomic sites  
573 masked to 'N'. A SNP-only alignment was generated using snp-sites<sup>42</sup>, and a maximum  
574 likelihood phylogeny was calculated on the variable sites using IQ-Tree<sup>27</sup> v1.6.10, inputting  
575 missing constant sites using the '-fconst' argument, and using a general time reversible  
576 (GTR) substitution model with a FreeRate model of heterogeneity<sup>43</sup> and 1000 UltraFast  
577 Bootstraps<sup>44</sup>.

578

579 For finescale analysis of high-quality genomes, we excluded sequences with >25% genomic  
580 sites masked to 'N' (i.e. >75% genomic sites passing filters at >5x and not masked). We used  
581 Gubbins<sup>26</sup> v2.4.1 (20 iterations) to generate recombination-masked full genome length and  
582 SNP-only alignments. Gubbins<sup>26</sup> identified 19 further putative regions of recombination  
583 affecting 2.1% of genomic sites (n=23,567) and 27 genes (listed in Supplementary Data 2),  
584 meaning we masked a maximum of 4.7% (53,638 sites) of the genome over the 38 regions.  
585 We used IQ-Tree on the SNP-only alignment containing 901 variable sites, inputting missing  
586 constant sites using the '-fconst' argument, and allowing the built-in model test to infer a  
587 K3Pu+F+I model and 10,000 UltraFast bootstraps.

588

589 To cluster genomes, we initially performed joint ancestral reconstruction<sup>45</sup> of SNPs on the  
590 phylogeny using pyjar (available at <https://github.com/simonrharris/pyjar>), and used this to  
591 determine phylogenetic clusters with a 10 SNP threshold in rPinecone<sup>28</sup> (available at  
592 <https://github.com/alexwailan/rpinecone>). We further investigated this by using IQ-tree to  
593 generate 100 standard non-parametric bootstraps on the maximum likelihood phylogeny,  
594 and used the resulting 100 trees as independent inputs to rPinecone, as described in the  
595 rPinecone manuscript<sup>28</sup>. We used the hierarchical clustering 'hclust' algorithm in R<sup>46</sup> to

596 group rPinecone clusters, and evaluated different proportions of trees supporting clusters  
597 against the phylogeny (Supplementary Figure 3).

598

599 For temporal analysis, our dataset was too large for robust model testing of all genomes, so  
600 we stratified our dataset by sublineage and country, then used the random sampler in R<sup>46</sup> to  
601 select a maximum of five genomes from each strata, plus all singleton strains, yielding a  
602 dataset of 138. We extracted the sequences from the multiple sequence alignment using  
603 seqtk and the subtree from our broader phylogeny using ape<sup>47</sup> v 5.4.1 `keep.tip`. Root-to-tip  
604 distance analysis from this subtree showed a correlation of 0.327 and R<sup>2</sup> of 0.11  
605 (Supplementary Figure 15), and we proceeded to BEAST analysis. We initially ran BEAST<sup>30,48</sup>  
606 v1.8.4 on our recombination-masked SNP-only alignment containing 592 variable sites,  
607 correcting for invariant sites using the constantPatterns argument, in triplicate using both a  
608 Strict Clock model<sup>49</sup> (starting rate prior 1.78E<sup>-7</sup>) and an Uncorrelated Relaxed Clock model<sup>50</sup>,  
609 with HKY substitution model<sup>51</sup> and diffuse gamma distribution prior<sup>52</sup> (shape 0.001, scale  
610 1000) over 100 million MCMC cycles with 10 million cycle burnin. We evaluated constant,  
611 relaxed lognormal, exponential and Bayesian Skyline (10 categories) population  
612 distributions<sup>53</sup>. All MCMC chains converged with high effective sample sizes, and on  
613 inspection of the marginal distribution of uclid.stdev we could not reject a Strick Clock. We  
614 used the marginal likelihood estimates from the triplicate BEAST runs as input to Path  
615 Sampling and Stepping Stone Sampling analysis<sup>54,55</sup>, and this suggested that the Strict Clock  
616 with Bayesian Skyline was the optimal model for this dataset (Supplementary Figure 16),  
617 with an inferred molecular clock rate of 1.23 x10<sup>-7</sup> substitutions/site/year. To ensure that  
618 our findings were not artefactual to the down-sampled dataset, we re-stratified the dataset  
619 by sublineage, country and year, selecting a maximum of 3 genomes from each stratum,  
620 plus all singleton strains, yielding a dataset of 168 genomes with 466 variable sites. We ran  
621 BEAST on this new subsampled dataset using the optimal Strict Clock (with starting rate  
622 prior of 1.23 x10<sup>-7</sup>, inferred from the previous analysis) with Bayesian Skyline from above,  
623 with the equivalent results (Supplementary Figure 17).

624

625 To evaluate the temporal dynamics of sublineages, we tested the temporal signal for the 4  
626 largest sublineages 1, 2, 8, and 14 (Supplementary Figure 10). Sublineage 14 had poor

627 temporal signal and was excluded from further analysis. We performed independent BEAST  
628 analyses on the remaining sublineage multiple sequence alignments using the optimal Strict  
629 Clock model with Bayesian Skyline (10 population groups), evaluating 3 independent chains  
630 of 200 million cycles for each.

631

632 To analyse the full dataset (n=520 after excluding heavily passaged samples or those with  
633 uncertain collection dates, 883 variable sites), after evaluating temporal signal  
634 (Supplementary Figure 18), we initially attempted to reproduce our model in BEAST 1.8.4,  
635 but this proved unachievable with our local implementation and compute arrangements. To  
636 analyse the full dataset, we therefore reconstructed the optimal BEAST v1.8.4 model (Strict  
637 Clock with reference rate prior of  $1.23 \times 10^{-7}$  s/s/y, Coalescent Bayesian Skyline distribution  
638 with 10 populations<sup>51,53</sup>) in a BEAST2<sup>56</sup> v2.6.3 implementation with BEAGLE<sup>48</sup> libraries  
639 optimised for Graphical Processing Units, analysing the 520 genomes over 500 million  
640 MCMC cycles in triplicate.

641

642 To further confirm the temporal signal in our full 520 genome tree, we used the  
643 TIPDATINGBEAST<sup>57</sup> package in R to perform a date randomisation test, generating 20 new  
644 datasets with randomly reassigned dates – BEAST2 analysis using the same prior conditions  
645 found no evidence of temporal signal in these replicates, indicating that the signal in our  
646 tree was not found by chance (Supplementary Figure 19).

647

648 We used logcombiner to generate consensus log and treefiles, and treeannotator to create  
649 median maximum credibility trees. We generated Bayesian Skyline and Lineage  
650 accumulation plots using the combined log and tree files in Tracer v1.7.1<sup>30</sup>, exporting the  
651 data for subsequent plotting in R. To evaluate the posterior distribution of population  
652 expansion times, we used the script population\_increase\_distribution\_BEAST.py (available  
653 at [https://github.com/chrisruis/tree\\_scripts](https://github.com/chrisruis/tree_scripts)), which uses the BEAST log and tree files to  
654 identify the first increase in relative genetic diversity from the PopSizes columns and the  
655 date of this increase using the corresponding number of nodes in the GroupSizes columns  
656 and the node heights in the respective tree. We required a 2-fold population expansion

657 (defined by setting ``-p`` to 100). The script outputs the proportion of trees in the posterior  
658 distribution that support an increase in relative genetic diversity, along with the distribution  
659 of expansion dates, which we plotted in R<sup>46</sup>. We repeated this analysis using the script  
660 `population_change_support_BEAST.py` (available at  
661 [https://github.com/chrisruis/tree\\_scripts](https://github.com/chrisruis/tree_scripts)), which looks for an increase or decrease of  
662 effective population size within a defined window, testing for supported start dates of a 2-  
663 fold population decline or expansion between 1990 and 2015.

664

665 Macrolide resistance alleles were inferred using the competitive mapping approach  
666 previously described<sup>4,36</sup> (available at [https://github.com/matbeale/Lihir Treponema 2020](https://github.com/matbeale/Lihir_Treponema_2020)).  
667 To infer pairwise SNP distances between samples, we used `pairsnp` (available at  
668 <https://github.com/gtonkinhill/pairsnp>). We constructed networks of minimum pairwise  
669 distance and shared lineages in R<sup>46</sup>, and plotted these as heatmaps using `ggplot2`<sup>58</sup>.  
670 Nucleotide diversity ( $\pi$ ) for different clades was inferred from the multiple sequence  
671 alignments using `EggLib`<sup>59</sup> v3.0.0b21, including variable sites present in at least 5% of  
672 genomes. For geospatial analysis, we used the `CoordinateCleaner`<sup>60</sup> v2.0-17 package in R to  
673 define the centroid position for each country, apart for Russia (where we used the centroid  
674 of the Tuva Republic) and Mexico (where we used Mexico City). Geographic distances  
675 between countries (using the country centroid or location defined above) were determined  
676 using the `distVincentyEllipsoid` function from the `geosphere`<sup>61</sup> v1.5-10 package. Correlations  
677 between pairwise genetic, geographic and temporal distance were inferred using Pearson's  
678 R Correlation via the `'cor'` function in R, where we compared 'real' correlation with 1000  
679 bootstraps resampled with replacement to obtain a p value. Sample counts were plotted  
680 using `ggmaps`<sup>62</sup> over maptiles downloaded from Stamen Design (<http://maps.stamen.com>).  
681 All phylogenetic trees were plotted in R using `ggtree`<sup>63</sup>. All figures used `ggplot2`<sup>58</sup> v3.3.2 for  
682 plotting.

683

## 684 Data Availability

685 Sequencing reads for all novel genomes have been deposited at the European Nucleotide  
686 Archive in BioProjects PRJEB28546, PRJEB33181 and PRJNA701499. All accessions,

687 corresponding sample identifiers and related metadata are available in Supplementary Data  
688 1.

## 689 Acknowledgements

690 The authors acknowledge the sequencing team at the Wellcome Sanger Institute, and  
691 Christoph Puethe and the Pathogen Informatics team for computational support. We thank  
692 additional technical staff involved in sample diagnostics, DNA extraction and sample  
693 retrieval in laboratories at Public Health England and NHS laboratories, UK; British Columbia  
694 CDC and Alberta Precision Laboratories, Canada; National Public Health Center, Budapest,  
695 Hungary; FRC Kazan Scientific Center, Tuva, Russia; National Institute for Communicable  
696 Diseases, Johannesburg, South Africa; Institute of Tropical Medicine, Antwerp, Belgium;  
697 Sahlgrenska University Hospital, Gothenburg, Sweden; Hospital Vall d'Hebron, Barcelona,  
698 Spain; Midlands Regional Hospital Portlaoise, Ireland; Pathology Queensland Central  
699 Laboratory, Australia; WHO Collaborating Centre for Gonorrhoea and other STIs, Sweden.  
700 We thank G. Tonkin-Hill, A. van Tonder, and members of the Thomson team for helpful  
701 discussions during analysis. MAB and NRT are supported by Wellcome funding to the Sanger  
702 Institute (#206194). MM is funded by the UKRI and NIHR [COV0335; MR/V027956/1,  
703 NIHR200125] and the EDCTP [RIA2018D-249]. DMW is funded by a Queensland Advancing  
704 Clinical Research Fellowship from the Queensland Government. DAW is supported by an  
705 Investigator Grant (1174555) from the National Health and Medical Research Council of  
706 Australia. SAL is funded by the National Institutes of Health (R01 AI42143). This research  
707 was funded in whole, or in part, by the Wellcome Trust (#206194). For the purpose of Open  
708 Access, the author has applied a CC-BY public copyright licence to any Author Accepted  
709 Manuscript version arising from this submission.

## 710 Author Contributions

711 Conceived and designed the study: MAB, MM, SAL, NRT. Coordinated collaboration, receipt  
712 and sequencing of samples: MM, MAB, MU. Collected, retrieved and prepared samples and  
713 patient metadata: MM, MJC, M-KL, RP, EB, TC, ME, CFN, AG, MG, CRK, RKh, Rku, MA, BJM,  
714 AO, EP, FP, CRi, DR, SS, ESm, ELS, GT, JHV, CW, DMW, DAW, GH, PN, MK, MU, SAL, MGM,  
715 HF. Performed laboratory work for sequencing: MAB, GT. Analysed the data: MAB. Provided

716 analytical tools and advice: CRu. Wrote the initial draft of the paper: MAB, with substantial  
717 contributions from NRT. All authors viewed and contributed to the final paper.

## 718 Competing Interests

719 MK declares institutional funding from Roche, Hologic and Siemens unrelated to this work.  
720 The remaining authors have no competing interests to declare. The funders had no input  
721 into the study design, interpretation or decision to submit for publication.

722

## 723 References

- 724 1. McGough, L. J. & Erbelding, E. Historical Evidence of Syphilis and Other Treponemes. in  
725 *Pathogenic Treponema: Molecular and Cellular Biology* (eds. Radolf, J. D. & Lukehart, S.  
726 A.) 183–195 (Caister Academic Press, 2006).
- 727 2. Baker, B. J. *et al.* Advancing the understanding of treponemal disease in the past and  
728 present. *Am. J. Phys. Anthropol.* **171**, 5–41 (2020).
- 729 3. Arora, N. *et al.* Origin of modern syphilis and emergence of a pandemic *Treponema*  
730 *pallidum* cluster. *Nat. Microbiol.* **2**, 16245 (2016).
- 731 4. Beale, M. A. *et al.* Genomic epidemiology of syphilis reveals independent emergence of  
732 macrolide resistance across multiple circulating lineages. *Nat. Commun.* **10**, 3255 (2019).
- 733 5. Giffin, K. *et al.* A treponemal genome from an historic plague victim supports a recent  
734 emergence of yaws and its presence in 15 th century Europe. *Sci. Rep.* **10**, 9499 (2020).
- 735 6. Majander, K. *et al.* Ancient Bacterial Genomes Reveal a High Diversity of *Treponema*  
736 *pallidum* Strains in Early Modern Europe. *Curr. Biol.* (2020)  
737 doi:10.1016/j.cub.2020.07.058.

- 738 7. Kojima, N. & Klausner, J. D. An Update on the Global Epidemiology of Syphilis. *Curr.*  
739 *Epidemiol. Rep.* **5**, 24–38 (2018).
- 740 8. Tampa, M., Sarbu, I., Matei, C., Benea, V. & Georgescu, S. Brief History of Syphilis. *J.*  
741 *Med. Life* **7**, 4–10 (2014).
- 742 9. Chesson, H. W., Dee, T. S. & Aral, S. O. AIDS mortality may have contributed to the  
743 decline in syphilis rates in the United States in the 1990s. *Sex. Transm. Dis.* **30**, 419–424  
744 (2003).
- 745 10. Fenton, K. A. *et al.* Infectious syphilis in high-income settings in the 21st century. *Lancet*  
746 *Infect. Dis.* **8**, 244–253 (2008).
- 747 11. Centers for Disease Control and Prevention. National Overview of STDs, 2016.  
748 <https://www.cdc.gov/std/stats16/natoverview.htm>. (2018).
- 749 12. Public Health England. Sexually transmitted infections and screening for chlamydia in  
750 England, 2017. [https://www.gov.uk/government/statistics/sexually-transmitted-](https://www.gov.uk/government/statistics/sexually-transmitted-infections-stis-annual-data-tables)  
751 [infections-stis-annual-data-tables](https://www.gov.uk/government/statistics/sexually-transmitted-infections-stis-annual-data-tables) (2018).
- 752 13. Surveillance Atlas of Infectious Diseases. *European Centre for Disease Prevention and*  
753 *Control* <https://www.ecdc.europa.eu/en/surveillance-atlas-infectious-diseases> (2017).
- 754 14. Zhou, Y. *et al.* Prevalence of HIV and syphilis infection among men who have sex with  
755 men in China: a meta-analysis. *BioMed Res. Int.* **2014**, 620431 (2014).
- 756 15. Korenromp, E. L. *et al.* Global burden of maternal and congenital syphilis and associated  
757 adverse birth outcomes-Estimates for 2016 and progress since 2012. *PloS One* **14**,  
758 e0211720 (2019).

- 759 16. Grillová, L. *et al.* Directly Sequenced Genomes of Contemporary Strains of Syphilis  
760 Reveal Recombination-Driven Diversity in Genes Encoding Predicted Surface-Exposed  
761 Antigens. *Front. Microbiol.* **10**, (2019).
- 762 17. Pinto, M. *et al.* Genome-scale analysis of the non-cultivable *Treponema pallidum* reveals  
763 extensive within-patient genetic variation. *Nat. Microbiol.* **2**, 16190 (2016).
- 764 18. Sun, J. *et al.* Tracing the origin of *Treponema pallidum* in China using next-generation  
765 sequencing. *Oncotarget* **7**, 42904–42918 (2016).
- 766 19. Chen, W. *et al.* Analysis of *Treponema pallidum* strains from China using improved  
767 methods for whole-genome sequencing from primary syphilis chancres. *J. Infect. Dis.*  
768 (2020) doi:10.1093/infdis/jiaa449.
- 769 20. Beale, M. A. & Lukehart, S. A. Archaeogenetics: What Can Ancient Genomes Tell Us  
770 about the Origin of Syphilis? *Curr. Biol.* **30**, R1092–R1095 (2020).
- 771 21. Edmondson, D. G., Hu, B. & Norris, S. J. Long-Term In Vitro Culture of the Syphilis  
772 Spirochete *Treponema pallidum* subsp. *pallidum*. *mBio* **9**, e01153-18 (2018).
- 773 22. Čejková, D. *et al.* Whole Genome Sequences of Three *Treponema pallidum* ssp. *pertenue*  
774 Strains: Yaws and Syphilis Treponemes Differ in Less than 0.2% of the Genome  
775 Sequence. *PLoS Negl. Trop. Dis.* **6**, e1471 (2012).
- 776 23. Tong, M.-L. *et al.* Whole genome sequence of the *Treponema pallidum* subsp. *pallidum*  
777 strain Amoy: An Asian isolate highly similar to SS14. *PLoS ONE* **12**, (2017).
- 778 24. Pětrošová, H. *et al.* Whole Genome Sequence of *Treponema pallidum* ssp. *pallidum*,  
779 Strain Mexico A, Suggests Recombination between Yaws and Syphilis Strains. *PLoS Negl.*  
780 *Trop. Dis.* **6**, e1832 (2012).



- 781 25. Pětrošová, H. *et al.* Resequencing of *Treponema pallidum* ssp. *pallidum* Strains Nichols  
782 and SS14: Correction of Sequencing Errors Resulted in Increased Separation of Syphilis  
783 Treponeme Subclusters. *PLOS ONE* **8**, e74319 (2013).
- 784 26. Croucher, N. J. *et al.* Rapid phylogenetic analysis of large samples of recombinant  
785 bacterial whole genome sequences using Gubbins. *Nucleic Acids Res.* gku1196 (2014)  
786 doi:10.1093/nar/gku1196.
- 787 27. Nguyen, L.-T., Schmidt, H. A., von Haeseler, A. & Minh, B. Q. IQ-TREE: A Fast and  
788 Effective Stochastic Algorithm for Estimating Maximum-Likelihood Phylogenies. *Mol.*  
789 *Biol. Evol.* **32**, 268–274 (2015).
- 790 28. Wailan, A. M. *et al.* rPinecone: Define sub-lineages of a clonal expansion via a  
791 phylogenetic tree. *Microb. Genomics* (2019) doi:10.1099/mgen.0.000264.
- 792 29. Graves, S. & Alden, J. Limited protection of rabbits against infection with *Treponema*  
793 *pallidum* by immune rabbit sera. *Sex. Transm. Infect.* **55**, 399–403 (1979).
- 794 30. Suchard, M. A. *et al.* Bayesian phylogenetic and phylodynamic data integration using  
795 BEAST 1.10. *Virus Evol.* **4**, (2018).
- 796 31. Marra, C. M. *et al.* Antibiotic Selection May Contribute to Increases in  
797 Macrolide-Resistant *Treponema pallidum*. *J. Infect. Dis.* **194**, 1771–1773 (2006).
- 798 32. Janier, M. *et al.* 2020 European guideline on the management of syphilis. *J. Eur. Acad.*  
799 *Dermatol. Venereol.* **n/a**, (2020).
- 800 33. Noda, A. A. *et al.* Bejel in Cuba: molecular identification of *Treponema pallidum* subsp.  
801 *endemicum* in patients diagnosed with venereal syphilis. *Clin. Microbiol. Infect.* **24**,  
802 1210.e1-1210.e5 (2018).

- 803 34. Kojima, Y., Furubayashi, K., Kawahata, T., Mori, H. & Komano, J. Circulation of Distinct  
804 *Treponema pallidum* Strains in Individuals with Heterosexual Orientation and Men Who  
805 Have Sex with Men. *J. Clin. Microbiol.* **57**, e01148-18 (2019).
- 806 35. Marks, M. *et al.* Diagnostics for Yaws Eradication: Insights From Direct Next-Generation  
807 Sequencing of Cutaneous Strains of *Treponema pallidum*. *Clin. Infect. Dis.* **66**, 818–824  
808 (2018).
- 809 36. Beale, M. A. *et al.* Yaws re-emergence and bacterial drug resistance selection after mass  
810 administration of azithromycin: a genomic epidemiology investigation. *Lancet Microbe*  
811 **1**, e263–e271 (2020).
- 812 37. Wood, D. E., Lu, J. & Langmead, B. Improved metagenomic analysis with Kraken 2.  
813 *Genome Biol.* **20**, 257 (2019).
- 814 38. Bolger, A. M., Lohse, M. & Usadel, B. Trimmomatic: a flexible trimmer for Illumina  
815 sequence data. *Bioinformatics* **30**, 2114–2120 (2014).
- 816 39. Quinlan, A. R. & Hall, I. M. BEDTools: a flexible suite of utilities for comparing genomic  
817 features. *Bioinformatics* **26**, 841–842 (2010).
- 818 40. Li, H. Aligning sequence reads, clone sequences and assembly contigs with BWA-MEM.  
819 *arXiv* (2013) doi:1303.3997v1 [q-bio.GN].
- 820 41. Li, H. *et al.* The Sequence Alignment/Map format and SAMtools. *Bioinformatics* **25**,  
821 2078–2079 (2009).
- 822 42. Page, A. J. *et al.* SNP-sites: rapid efficient extraction of SNPs from multi-FASTA  
823 alignments. *Microb. Genomics* **2**, (2016).

- 824 43. Soubrier, J. *et al.* The Influence of Rate Heterogeneity among Sites on the Time  
825 Dependence of Molecular Rates. *Mol. Biol. Evol.* **29**, 3345–3358 (2012).
- 826 44. Hoang, D. T., Chernomor, O., von Haeseler, A., Minh, B. Q. & Vinh, L. S. UFBoot2:  
827 Improving the Ultrafast Bootstrap Approximation. *Mol. Biol. Evol.* **35**, 518–522 (2018).
- 828 45. Pupko, T., Pe, I., Shamir, R. & Graur, D. A Fast Algorithm for Joint Reconstruction of  
829 Ancestral Amino Acid Sequences. *Mol. Biol. Evol.* **17**, 890–896 (2000).
- 830 46. R Core Team. *R: A Language and Environment for Statistical Computing*. (R Foundation  
831 for Statistical Computing, 2014).
- 832 47. Paradis, E. & Schliep, K. ape 5.0: an environment for modern phylogenetics and  
833 evolutionary analyses in R. *Bioinformatics* **35**, 526–528 (2019).
- 834 48. Ayres, D. L. *et al.* BEAGLE: An Application Programming Interface and High-Performance  
835 Computing Library for Statistical Phylogenetics. *Syst. Biol.* **61**, 170–173 (2012).
- 836 49. Ferreira, M. A. R. & Suchard, M. A. Bayesian analysis of elapsed times in continuous-time  
837 Markov chains. *Can. J. Stat.* **36**, 355–368 (2008).
- 838 50. Drummond, A. J., Ho, S. Y. W., Phillips, M. J. & Rambaut, A. Relaxed Phylogenetics and  
839 Dating with Confidence. *PLOS Biol.* **4**, e88 (2006).
- 840 51. Hasegawa, M., Kishino, H. & Yano, T. Dating of the human-ape splitting by a molecular  
841 clock of mitochondrial DNA. *J. Mol. Evol.* **22**, 160–174 (1985).
- 842 52. Yang, Z. Maximum likelihood phylogenetic estimation from DNA sequences with  
843 variable rates over sites: Approximate methods. *J. Mol. Evol.* **39**, 306–314 (1994).

- 844 53. Drummond, A. J., Rambaut, A., Shapiro, B. & Pybus, O. G. Bayesian Coalescent Inference  
845 of Past Population Dynamics from Molecular Sequences. *Mol. Biol. Evol.* **22**, 1185–1192  
846 (2005).
- 847 54. Baele, G. *et al.* Improving the accuracy of demographic and molecular clock model  
848 comparison while accommodating phylogenetic uncertainty. *Mol. Biol. Evol.* **29**, 2157–  
849 2167 (2012).
- 850 55. Baele, G., Li, W. L. S., Drummond, A. J., Suchard, M. A. & Lemey, P. Accurate Model  
851 Selection of Relaxed Molecular Clocks in Bayesian Phylogenetics. *Mol. Biol. Evol.* **30**,  
852 239–243 (2013).
- 853 56. Bouckaert, R. *et al.* BEAST 2.5: An advanced software platform for Bayesian evolutionary  
854 analysis. *PLOS Comput. Biol.* **15**, e1006650 (2019).
- 855 57. Rieux, A. & Khatchikian, C. E. tipdatingbeast: an r package to assist the implementation  
856 of phylogenetic tip-dating tests using beast. *Mol. Ecol. Resour.* **17**, 608–613.
- 857 58. Wickham, H. *ggplot2: Elegant Graphics for Data Analysis*. (Springer-Verlag, 2009).
- 858 59. De Mita, S. & Siol, M. EggLib: processing, analysis and simulation tools for population  
859 genetics and genomics. *BMC Genet.* **13**, 27 (2012).
- 860 60. Zizka, A. *et al.* CoordinateCleaner: Standardized cleaning of occurrence records from  
861 biological collection databases. *Methods Ecol. Evol.* **10**, 744–751 (2019).
- 862 61. Hijmans, R. J. *geosphere: Spherical Trigonometry*. (2019).
- 863 62. Kahle, D. & Wickham, H. ggmap: Spatial Visualization with ggplot2. *R J.* **5**, 144 (2013).

864 63. Yu, G., Smith, D. K., Zhu, H., Guan, Y. & Lam, T. T.-Y. ggtree: an r package for visualization  
865 and annotation of phylogenetic trees with their covariates and other associated data.  
866 *Methods Ecol. Evol.* **8**, 28–36 (2017).

867

## 868 **Supplementary Figures**

869 **Supplementary Figure 1. Phylogenetic distribution of 726 *Treponema pallidum* ssp**  
870 ***pallidum* partial genomes.** Maximum likelihood phylogeny of 726 partial (>25% of genome  
871 positions) genomes shows two primary lineages (Nichols, SS14), with no obvious correlation  
872 by country or continent. Tree tip points are coloured by continent, while coloured strips  
873 show continent, country and TPA lineage. One very low coverage sample (TPA\_BCC144,  
874 Canada, 47% genome breadth, 7.9X mean coverage) appears basal to the SS14-lineage clade  
875 in this phylogeny, but due to low coverage it was not possible to determine the correct  
876 placement.

877

878 **Supplementary Figure 2. Finescale analysis of 528 high quality (>75% reference sites) TPA**  
879 **genomes and sublineages.** Recombination masked WGS phylogeny of 528 genomes. Tree  
880 tips and coloured strips show sublineage.

881

882 **Supplementary Figure 3. Evaluating phylogenomic clustering using bootstrap resampled**  
883 **trees.** We generated 100 bootstraps from our finescale analysis of 528 TPA genomes,  
884 independently running rPinecone (10 SNP threshold) on each bootstrapped tree.  
885 Hierarchical clustering was used to group rPinecone sublineages, and we applied different  
886 support thresholds (minimum % of trees remaining) to explore the consistency of  
887 sublineages. Nichols-sublineages were all well supported, but some SS14-sublineages lacked  
888 support in many bootstraps. To focus on the more stable sublineages we required that at  
889 least 5% of the bootstrap replicates supported a cluster. Plot shows maximum likelihood  
890 phylogeny, with metadata columns showing cluster assignment along the x-axis for the  
891 original maximum likelihood cluster assignment, then allowing for 95%, 80%, 50%, 20% and

892 5% of bootstrap variation observed. Final sub-lineage assignments are shown against the 5%  
893 cluster assignments. Note that non-zero branch lengths were added by IQ-Tree during  
894 maximum likelihood tree estimation, leading to an artifactual ladder-like appearance for  
895 sublineage 1.

896

897 **Supplementary Figure 4. Detailed subtree of SS14-lineage.** Recombination masked WGS  
898 phylogeny, showing the SS14-lineage and sublineages. The low diversity globally distributed  
899 sublineage 1 has been collapsed to enable visualization of the remaining sublineages. Tip  
900 points are coloured by sublineage, and coloured strips show sublineage and country. Blue  
901 triangle indicates collapsed Nichols-lineage, pink triangle indicates collapsed sublineage 1.  
902 Two samples close to the root of the common SS14-lineage clades were clustered as  
903 sublineage 1, and are shown.

904

905 **Supplementary Figure 5. Subtree highlighting novel Nichols-lineage strains.** Recombination  
906 masked WGS phylogeny, showing the Nichols-lineage and sublineages. Tip points are  
907 coloured by sublineage, and coloured strips show sublineage and country. Shaded boxes  
908 highlight basal Nichols-lineage outgroup sublineages 6 and 7. The large clonal sublineage 14  
909 has been collapsed to enable clearer visualization of the remaining taxa. The pink triangle  
910 indicates collapsed SS14-lineage, blue triangle indicates the collapsed sublineage 14.

911

912 **Supplementary Figure 6. Commonly used Nichols Reference genomes form a**  
913 **monophyletic clade unrelated to contemporary clinical strains.** A- Recombination masked  
914 WGS phylogeny, showing the Nichols-lineage and sublineages. Shaded grey box shows a  
915 monophyletic clade containing commonly used reference genomes as well as genetically  
916 related strains. Tip points are coloured by sublineage, and coloured strips show sublineage  
917 and country. Pink triangle indicates collapsed SS14-lineage. B- Expanded view of a seemingly  
918 extinct clade containing common reference strains including Nichols\_v2, DAL-1 and  
919 Seattle\_Nichols. The most recent sample closely related to the reference strains (TPA\_USL-  
920 SEA-83-1) was collected in 1983, while the latest sample for the entire clade (TPA\_USL-Phil-  
921 3) was collected in 1987. The provenance of the sample originally used for sequencing the

922 DAL-1 genome is uncertain, but in the literature the original isolation was in 1988. The  
923 placement of both DAL-1 and TPA\_USL-SEA-83-1 within the diversity of Nichols-1912  
924 derivatives suggests the possibility of the samples being mislabeled in the handling  
925 laboratories.

926

927 **Supplementary Figure 7. Finescale analysis of 528 high quality TPA genomes and**  
928 **sublineages, showing distribution of samples sequenced directly from clinical samples and**  
929 **those passaged in rabbit model.** A – Whole genome phylogeny showing distribution of  
930 samples sequenced directly from clinical sample or rabbit-passaged. B – Distribution of  
931 samples sequenced directly from clinical sample and rabbit-passaged samples according to  
932 sublineage. Samples passaged in rabbits are distributed throughout the global TPA  
933 phylogeny, and present in 9/17 sublineages. Older samples from before 2000 were isolated  
934 via rabbit passage, and dominate extinct clusters, as well as clustering close to the most  
935 recent common ancestor of contemporary sublineages such as SS14 sublineage 1.

936

937 **Supplementary Figure 8. Bayesian Skyline analysis of population decline and expansion**  
938 **start dates.** Plots show posterior distribution of supporting trees for the start of either a 2-  
939 fold decline (pink) or expansion (blue) using a scanning approach within a window of 1990-  
940 2015. Analysis provides strong support for a population bottleneck in or around 2000, and  
941 moderate support for a subsequent expansion after 2010. Population changes are scaled to  
942 the population size averaged over the starting period for each tree. Therefore, if a particular  
943 tree already exhibited a decline near the starting timepoint, this may mean this tree does  
944 not show expansion, resulting in reduced overall support for expansion.

945

946 **Supplementary Figure 9. Bayesian Skyline analysis of sublineages.** Plots show population  
947 expansions occurring during the early 2000s for all sublineages with >15 samples apart from  
948 sublineage 14. Sublineage 14, which had low temporal signal, did not converge after  
949 multiple BEAST runs. Shows Skyline plots of sublineages 1, 2, 8 and plot for all samples from  
950 Figure 5.

951

952 **Supplementary Figure 10. Subtrees of major sublineages, with corresponding root-to-tip**  
953 **distance plots.** All subtrees showed some evidence of temporal signal, but this was very  
954 weak for the recently emerged sublineage 14. Graphs are annotated with slope and time to  
955 most recent common ancestor (TMRCA) inferred directly from the maximum likelihood  
956 subtree, not BEAST.

957

958 **Supplementary Figure 11. Finescale analysis of 528 high quality TPA genomes and**  
959 **sublineages, highlighting private and singleton sublineages.** Private and singleton  
960 sublineages are nested within the existing diversity of the TPA phylogeny. Tip points indicate  
961 sublineage, coloured tracks highlight singletons or private sublineages (with corresponding  
962 sublineage number), and country.

963

964 **Supplementary Figure 12. Effect of geographic distance on genetic distance.** A- Pairwise  
965 comparison of genetic distance (SNPs) and geographic distance (km; calculated using  
966 country centroids) within Nichols- and SS14-lineages, including linear regression (95% CI not  
967 visible). B- Pairwise comparison of genetic distance (SNPs) and geographic distance (km;  
968 calculated using country centroids) within the four major multi-country sublineages (SS14:  
969 1, 2; Nichols: 8, 14). Includes linear regression (95% CI not visible)

970

971 **Supplementary Figure 13. Sharing of sublineages and closely related strains within and**  
972 **between British Columbia (Canada) and England (UK).** A- Syphilis incidence per 100,000  
973 population by year for British Columbia, (Canada) and England (UK) using currently  
974 published data. B- TPA sublineage counts for each year, using high quality genomes from  
975 British Columbia (n=84) and England (n=240). British Columbia samples collected from 2000-  
976 2018, English samples collected from 2012-2018. C- Pairwise comparison of SNP distance  
977 distributions from samples within and between British Columbia and England. D-  
978 Comparison of SNP distance and temporal distance within and between British Columbia  
979 and England. The plot is divided into hexagonal bins, with the colour of each hexagon  
980 representing the number of comparisons (white=none, purple=few, green=many, see scale).  
981 Linear regression lines also shown (95% CI not visible).



982

983 **Supplementary Figure 14. Multicountry sublineages are broadly macrolide resistant.** A-

984 Whole genome phylogeny showing distribution of macrolide resistance conferring SNPs  
985 (A2058G and A2059G). B- Distribution of macrolide resistance SNPs by sublineage,  
986 indicating number of samples per sublineage, and sublineage type. Note that while the  
987 common A2058G mutation was found in six sublineages (both Nichols- and SS14-lineages),  
988 we also found the less common A2059G in both SS14-lineage (sublineages 1, 2) and Nichols-  
989 lineage (sublineage 6).

990

991 **Supplementary Figure 15. Maximum Likelihood phylogeny of 138 representatively**

992 **subsampled genomes.** A- Maximum likelihood phylogeny of 138 genomes randomly  
993 sampled to be representative of sublineage and country. B- Scatterplot showing root-to-tip  
994 distance against collection date, illustrating temporal signal in the dataset. C- Expanded  
995 version of B, showing regressed x-intercept.

996

997 **Supplementary Figure 16. Bayesian maximum credibility phylogeny of 138 representative**  
998 **genomes shows population contraction during the 1990s, followed by rapid expansion**  
999 **from the early 2000s onwards.** A- Time-scaled phylogeny of 138 genomes randomly

1000 sampled to be representative of sublineage, country and collection year. Coloured tracks  
1001 indicate sublineage, country and collection year. Node points are shaded according to  
1002 posterior support (black  $\geq 96\%$ , dark grey  $> 91\%$ , light grey  $> 80\%$ ). Red bars on nodes indicate  
1003 95% Highest Posterior Density intervals. Blue line and shaded area highlights post-2000  
1004 expansion of lineages. B- Bayesian Skyline plot shows decline of effective population size  
1005 after the second world war, flattening in the 1960s, followed by a sharp decline and rapid  
1006 reemergence during the 1990s and 2000s.

1007

1008 **Supplementary Figure 17. Secondary BEAST analysis of 168 separately subsampled**  
1009 **representative genomes.** A- Time-scaled phylogeny of 168 genomes randomly sampled to

1010 be representative of sublineage, country and collection year. Node points are shaded  
1011 according to posterior support (black  $\geq 96\%$ , dark grey  $> 91\%$ , light grey  $> 80\%$ ). Red bars on

1012 nodes indicate 95% Highest Posterior Density intervals. Blue line and shaded area highlights  
1013 post-2000 expansion of lineages. B- Bayesian Skyline plot shows decline of effective  
1014 population size after the second world war, flattening in the 1960s, followed by a sharp  
1015 decline and reemergence during the 1990s and 2000s, indicative of a sharp bottleneck.

1016

1017 **Supplementary Figure 18. Maximum likelihood tree of 520 TPA genomes with minimal**  
1018 **passage and robust collection dates, with corresponding root-to-tip distance plot.** Within  
1019 the full tree, the temporal signal was weaker than in our subsampled dataset, but still  
1020 plausible, given our prior analyses. Graphs are annotated with slope and time to most  
1021 recent common ancestor (TMRCA) inferred directly from the maximum likelihood subtree,  
1022 not BEAST.

1023

1024 **Supplementary Figure 19. Date Randomisation Test for full BEAST2 dataset confirms the**  
1025 **temporal signal in the true dataset compared to 20 resampled datasets with randomly**  
1026 **reassigned tipdates.** The median clock rate for the real dataset was  $1.27 \times 10^{-7}$ , while all  
1027 randomly assigned datasets gave substantially lower clock rates; the highest median clock  
1028 rate for the randomized datasets was  $8.02 \times 10^{-9}$ . Real sample (blue), randomized samples  
1029 (pink).

1030

1031 **Supplementary Data 1.** Metadata and read accessions for all samples included in this study

1032

1033 **Supplementary Data 2.** Genomic regions masked due through prefiltering or recombination  
1034 analysis.

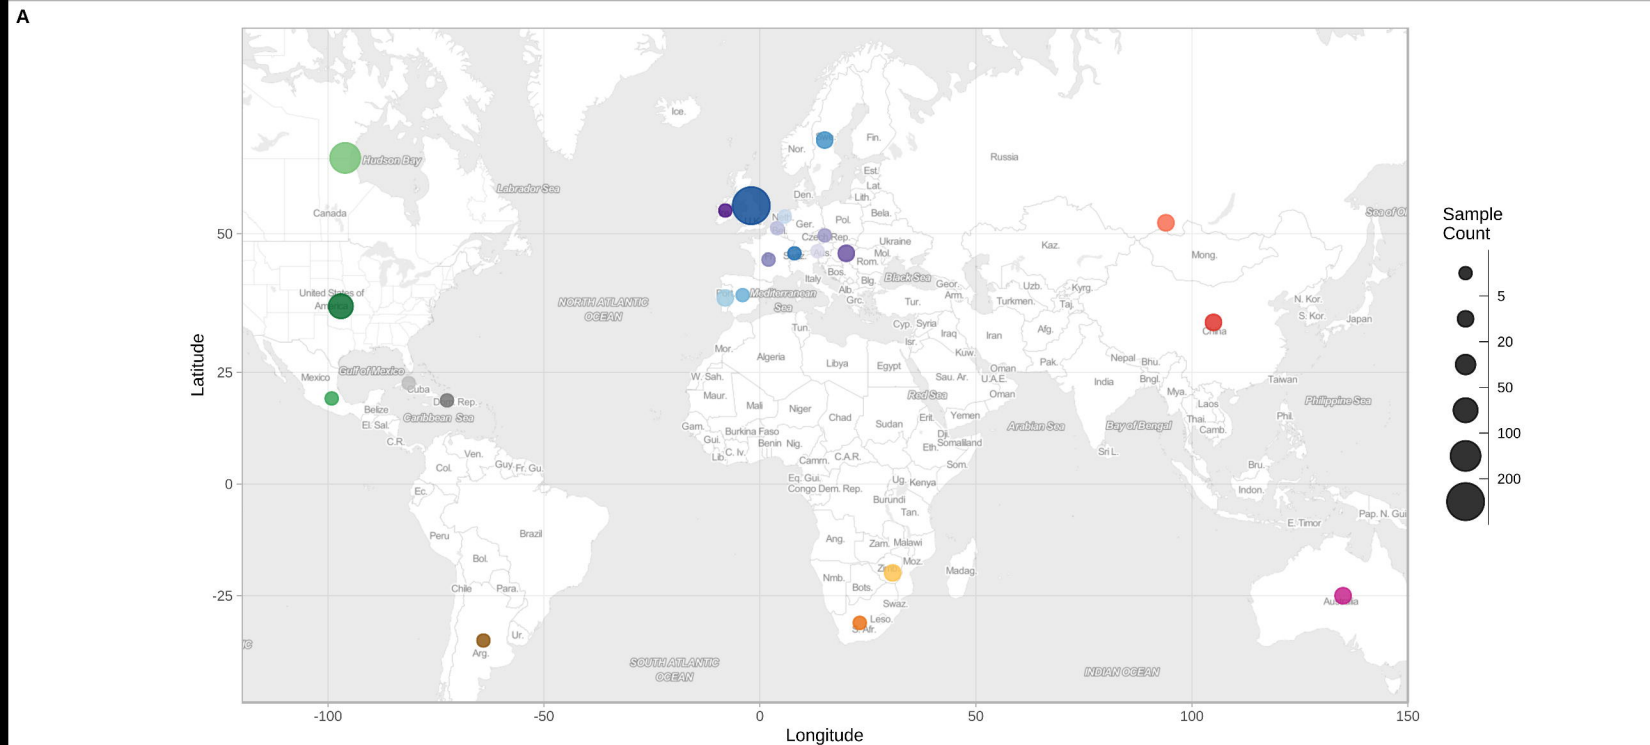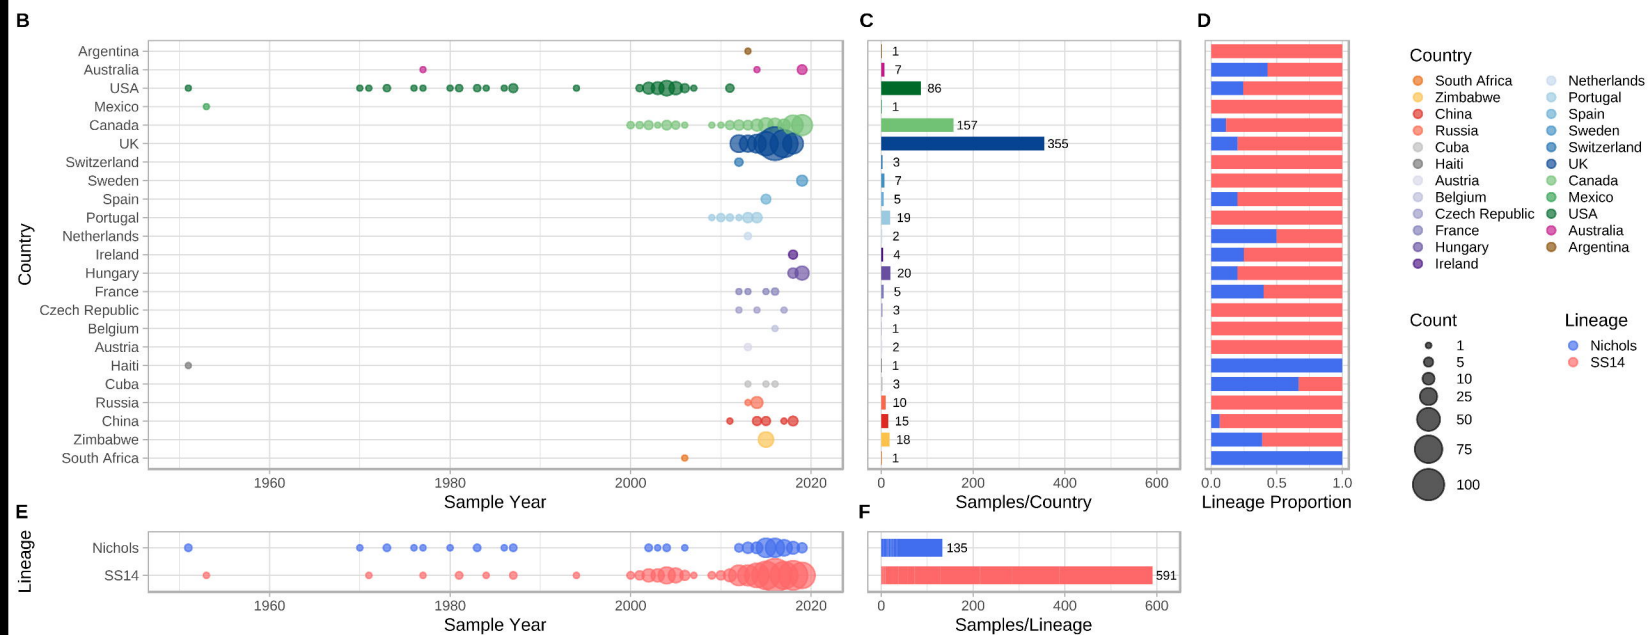

A - SS14-lineage phylogeny

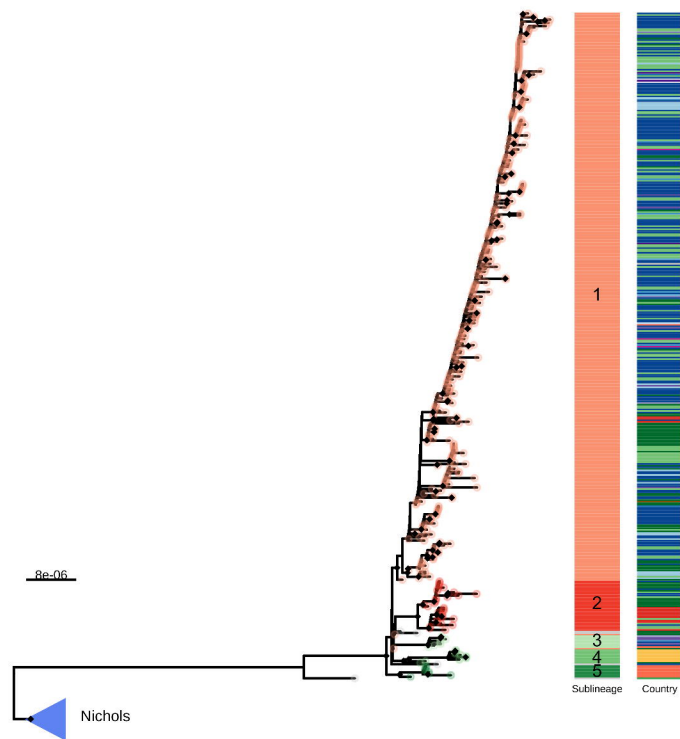

B - Nichols-lineage phylogeny

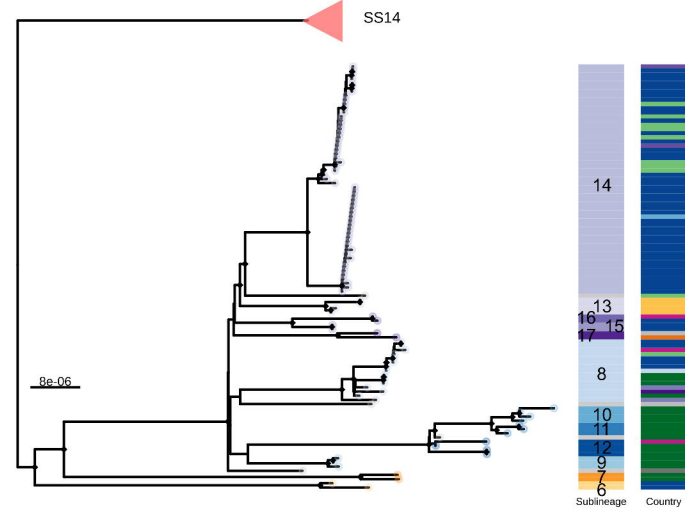

Key

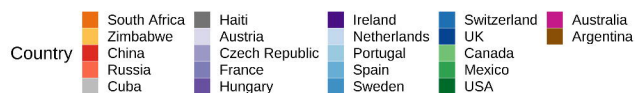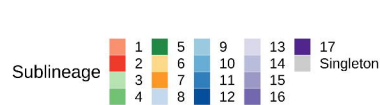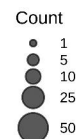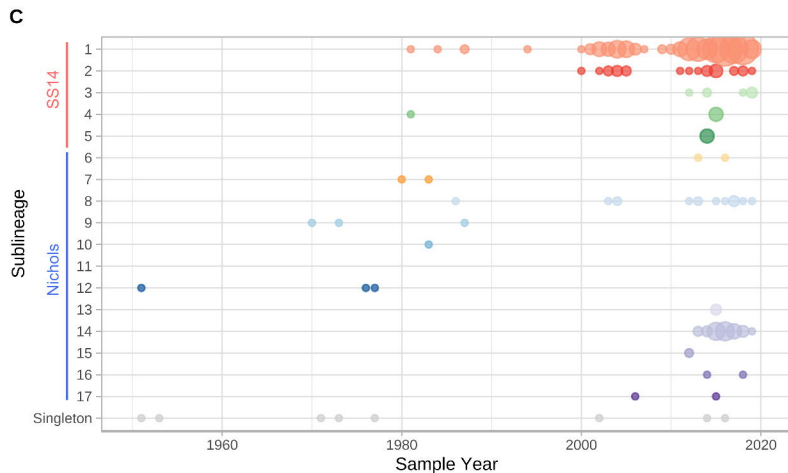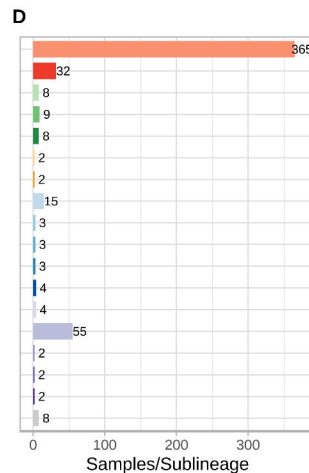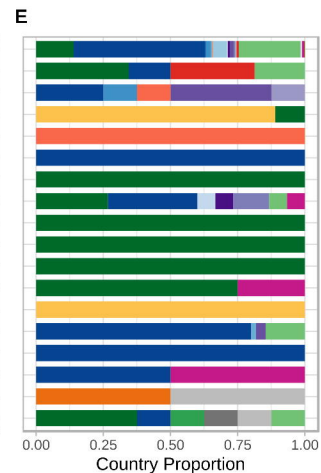

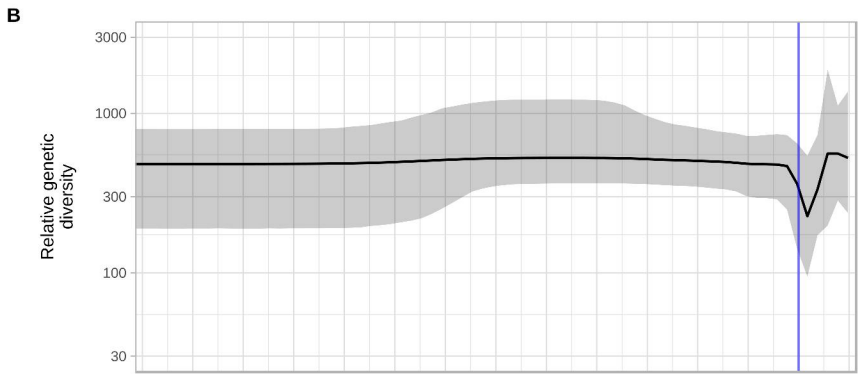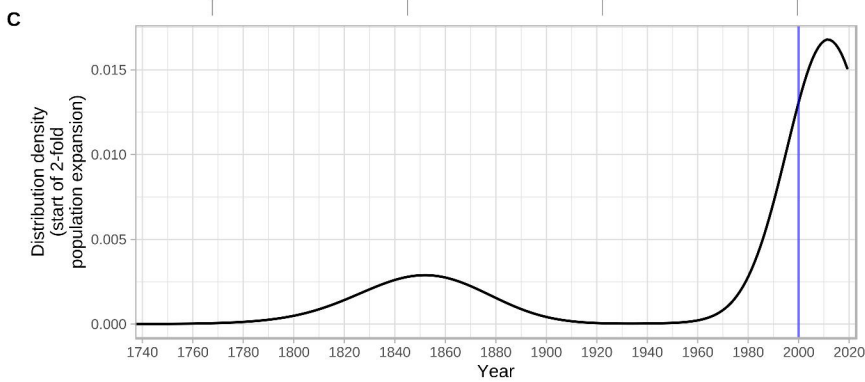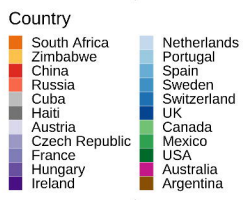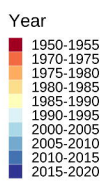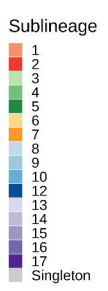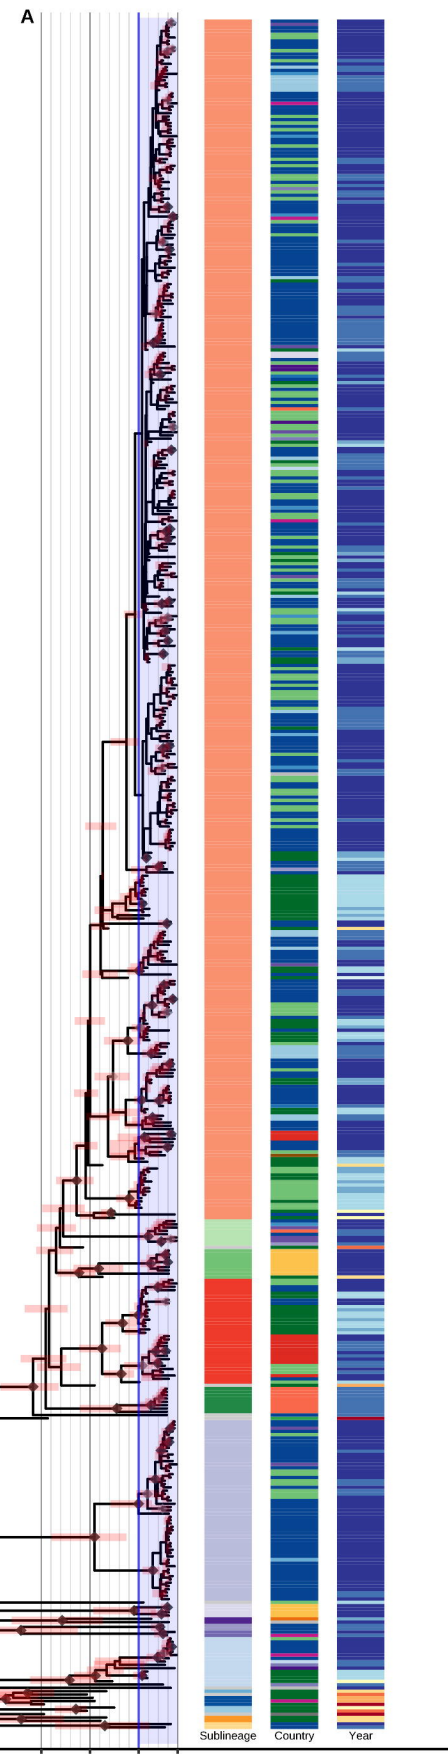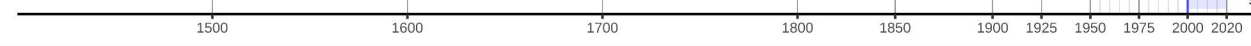

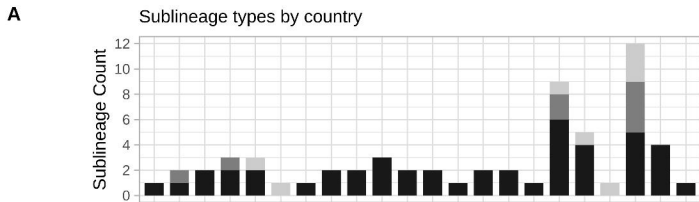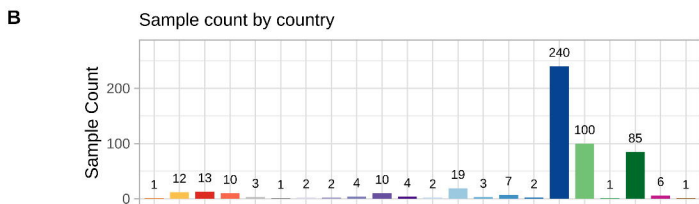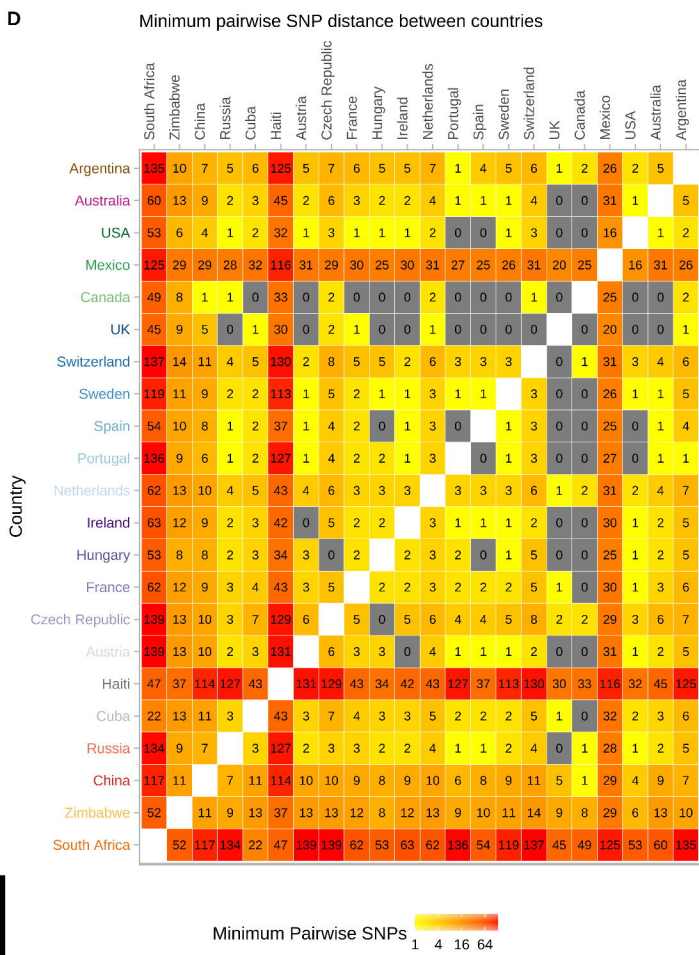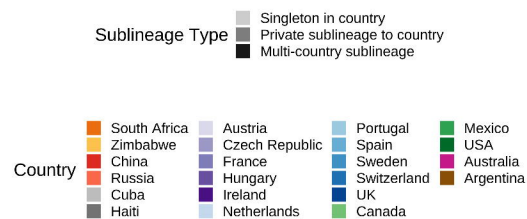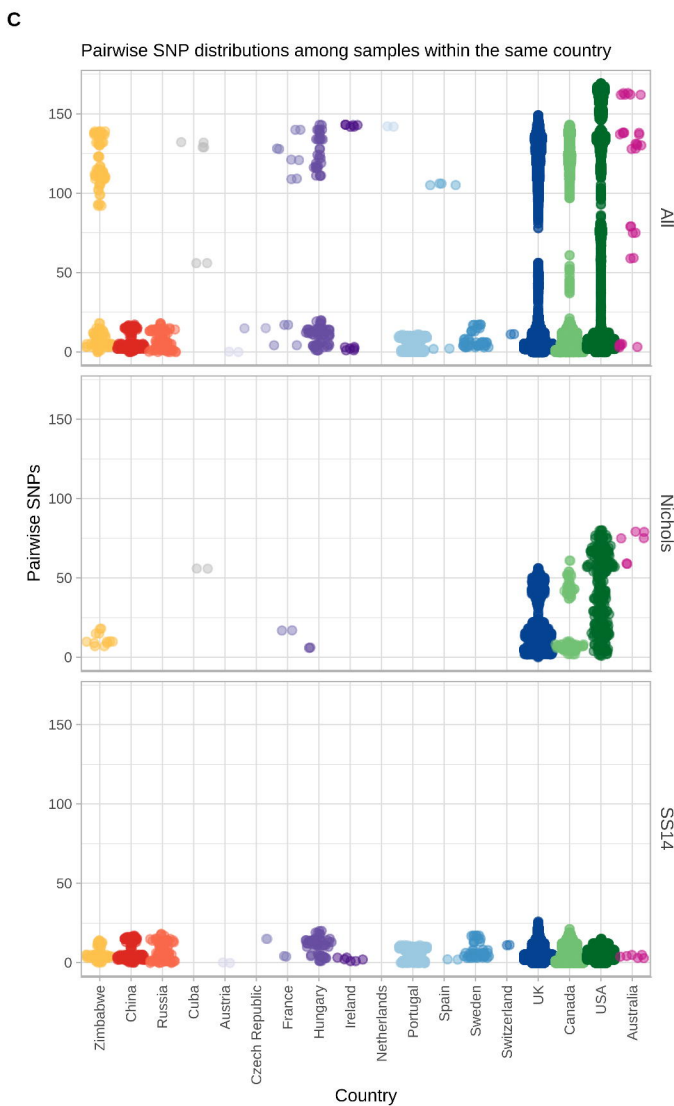

Source: https://www.medrxiv.org/content/medrxiv/early/2021/03/28/2021.03.25.21250180.full.pdf
